# Supplementary material
Source: PubMed Central journal article supplement (PMC9305594)
Supplement: jamaoncol-e222719-s001.pdf [file jamaoncol-e222719-s001.pdf]

1  
2  
3  
4  
5  
6  
7  
8  
9  
10  
11  
12  
13  
14  
15  
16  
17  
18  
19  
20  
21  
22  
23  
24  
25  
26  
27  
28  
29  
30  
31  
32  
33  
34  
35

## **Clinical Study Protocol**

### **Clinical Study of the Efficacy of Icotinib in Patients with Clinically Diagnosed Lung Cancer Carrying EGFR sensitive mutations Detected by ctDNA Testing**

**Protocol number: BD-IC-IV90**

**Version: 1.2**

**Date: October 15, 2017**

**Sponsor: Cancer Hospital, Chinese Academy of Medical Science**

#### **Confidentiality Statement**

The ownership of the information included in this document (particularly unpublished data) belongs to the sponsor and therefore the information provided to you (the investigator, potential investigator or consultant) is confidential and should only be used for review by you, your staff or any relevant ethics committees. Information in this document should not be disclosed to others without the written permission of the sponsor, except in cases where the information is required to obtain informed consent from patients who may be administered with the drug.

36  
37  
38  
39  
40  
41  
42  
43  
44  
45  
46  
47  
48  
49  
50  
51  
52  
53  
54  
55  
56  
57  
58  
59  
60  
61  
62  
63  
64  
65  
66  
67  
68  
69  
70  
71  
72  
73  
74  
75  
76  
77  
78  
79  
80  
81  
82

**Table of Contents**

**1 STUDY BACKGROUND AND RATIONALE ..... 5**

1.1 OVERVIEW OF NON-SMALL CELL LUNG CANCER ..... 5

1.2 FIRST-LINE TREATMENT OF EGFR-MUTATED NON-SMALL CELL LUNG CANCER ..... 5

    1.2.1 *Introduction to EGFR* ..... 5

    1.2.2 *Implications of EGFR Sensitive Mutations in the Treatment of Lung Cancer*..... 5

    1.2.3 *Clinical Profile of EGFR-TKI and Icotinib* ..... 5

1.3 REPORT ABOUT EGFR MUTATIONS IN NON-LUNG CANCER LESIONS ..... 7

1.4 CURRENT STATUS OF EGFR GENE TESTING..... 7

    1.4.1 *Difficulties in Tissue Sampling for Clinical EGFR Testing* ..... 7

    1.4.2 *Value of Blood EGFR Testing* ..... 8

    1.4.3 *Development of Molecular Diagnostic Techniques for EGFR Mutations* ..... 8

**2 STUDY OBJECTIVE ..... 10**

2.1 PRIMARY OBJECTIVE..... 10

2.2 SECONDARY OBJECTIVE..... 10

2.3 EXPLORATORY OBJECTIVE ..... 10

**3 STUDY DESIGN..... 11**

3.1 STUDY DESIGN AND PLAN..... 11

3.2 SELECTION OF SUBJECTS..... 11

    3.2.1 *Inclusion Criteria*..... 11

    3.2.2 *Exclusion Criteria*..... 12

3.3 SAMPLE SIZE AND STUDY DURATION ..... 13

3.4 WITHDRAWAL OF SUBJECTS FROM THE STUDY..... 13

3.5 TREATMENT PLAN..... 14

    3.5.1 *Treatment Procedures* ..... 14

    3.5.2 *Dose Reduction and Discontinuation of Icotinib*..... 15

    3.5.3 *Concomitant Therapies and Smoking* ..... 16

    3.5.4 *Discontinuation Criteria*..... 16

    3.5.5 *Concomitant Medications* ..... 17

    3.5.6 *Treatment Compliance* ..... 17

3.6 STUDY ENDPOINTS..... 17

    3.6.1 *Efficacy Endpoints* ..... 17

    3.6.2 *Safety Measures* ..... 18

    3.6.3 *Study Period*..... 18

3.7 STUDY PROCEDURES ..... 19

    3.7.1 *Screening Period*..... 19

    3.7.2 *Treatment Period*..... 19

    3.7.3 *After the End of Treatment* ..... 23

    3.7.4 *Interim Visits* ..... 23

    3.7.5 *Follow-up after Progression of Disease* ..... 23

3.8 DATA QUALITY..... 23

3.9 ARCHIVING ..... 23

**4 INVESTIGATIONAL DRUG ..... 24**

4.1 ICOTINIB ..... 24

    4.1.1 *Name, Physicochemical Properties, Properties, Strength, Ingredients, Dosage and Administration, and Storage of Clinical Investigational Drug*..... 24

    4.1.2 *Package and Label*..... 24

|     |           |                                                                            |           |
|-----|-----------|----------------------------------------------------------------------------|-----------|
| 83  | 4.1.3     | <i>Drug Dispensing and Accountability</i> .....                            | 24        |
| 84  | <b>5</b>  | <b>ETHICAL AND LEGAL ISSUES</b> .....                                      | <b>26</b> |
| 85  | 5.1       | ETHICS COMMITTEE (EC) OR INSTITUTIONAL REVIEW BOARD (IRB).....             | 26        |
| 86  | 5.2       | ETHICAL GUIDANCE.....                                                      | 26        |
| 87  | 5.3       | SUBJECT INFORMATION AND INFORMED CONSENT.....                              | 26        |
| 88  | 5.4       | CONFIDENTIALITY.....                                                       | 26        |
| 89  | <b>6</b>  | <b>STATISTICAL METHODS AND DETERMINATION OF SAMPLE SIZE</b> .....          | <b>27</b> |
| 90  | 6.1       | STATISTICAL ANALYSIS PLAN.....                                             | 27        |
| 91  | 6.1.1     | <i>Analysis Population</i> .....                                           | 27        |
| 92  | 6.1.2     | <i>Baseline and Demographics</i> .....                                     | 27        |
| 93  | 6.1.3     | <i>Efficacy Analysis</i> .....                                             | 27        |
| 94  | 6.2       | DETERMINATION OF SAMPLE SIZE.....                                          | 27        |
| 95  | <b>7</b>  | <b>ADVERSE EVENT</b> .....                                                 | <b>28</b> |
| 96  | 7.1       | PRECAUTIONS/WARNINGS .....                                                 | 28        |
| 97  | 7.2       | MONITORING OF ADVERSE EVENT .....                                          | 28        |
| 98  | 7.3       | DEFINITION OF ADVERSE EVENT.....                                           | 28        |
| 99  | 7.3.1     | <i>Adverse Event</i> .....                                                 | 28        |
| 100 | 7.3.2     | <i>Serious Adverse Event</i> .....                                         | 28        |
| 101 | 7.3.3     | <i>Unexpected Adverse Event</i> .....                                      | 29        |
| 102 | 7.3.4     | <i>Relationship between Adverse Event and Investigational Drug</i> .....   | 29        |
| 103 | 7.3.5     | <i>Recording of Adverse Event</i> .....                                    | 30        |
| 104 | 7.4       | REPORTING OF SERIOUS ADVERSE EVENT.....                                    | 30        |
| 105 | <b>8</b>  | <b>DATA MANAGEMENT</b> .....                                               | <b>32</b> |
| 106 | 8.1       | COMPLETION AND TRANSFER OF CASE REPORT FORM .....                          | 32        |
| 107 | 8.2       | DATA ENTRY AND MODIFICATION.....                                           | 32        |
| 108 | 8.3       | DATA LOCKING .....                                                         | 32        |
| 109 | 8.4       | DATA PROCESSING .....                                                      | 32        |
| 110 | <b>9</b>  | <b>INFORMED CONSENT</b> .....                                              | <b>33</b> |
| 111 | <b>10</b> | <b>APPENDIX</b> .....                                                      | <b>34</b> |
| 112 | 10.1      | PERFORMANCE STATUS (ECOG SCORE) .....                                      | 34        |
| 113 | 10.2      | TNM STAGING SYSTEM - UICC CRITERIA.....                                    | 34        |
| 114 | 10.3      | RESPONSE EVALUATION CRITERIA IN SOLID TUMORS RECIST 1.1 .....              | 36        |
| 115 | 10.4      | NCI COMMON TERMINOLOGY CRITERIA FOR ADVERSE EVENTS (CTCAE), VERSION 4.03.. | 37        |
| 116 | 10.5      | EFFECTIVE MANAGEMENT OF EGFR TKI-ASSOCIATED CUTANEOUS ADVERSE REACTIONS.   | 37        |
| 117 | 10.6      | TESTING OF TUMOR SPECIMENS.....                                            | 37        |
| 118 | 10.7      | NEW YORK HEART ASSOCIATION FUNCTIONAL CLASSIFICATION.....                  | 38        |
| 119 | 10.8      | CALCULATION OF CREATININE CLEARANCE.....                                   | 39        |
| 120 | <b>11</b> | <b>REFERENCES</b> .....                                                    | <b>40</b> |
| 121 | <b>12</b> | <b>PROTOCOL SIGNATURE PAGE</b> .....                                       | <b>42</b> |
| 122 |           |                                                                            |           |
| 123 |           |                                                                            |           |

124

125

126

### Abbreviation List

|        |                                                              |
|--------|--------------------------------------------------------------|
| AE     | Adverse Event (AE)                                           |
| ALT    | Alanine aminotransferase (serum alanine transaminase)        |
| AST    | Aspartate aminotransferase (serum aspartate transaminase)    |
| CRF    | Case Report Form                                             |
| CR     | Complete Response                                            |
| CT     | Computed tomography                                          |
| CTC-AE | Common Terminology Criteria for Adverse Events               |
| ECG    | Electrocardiogram                                            |
| EGFR   | Epidermal growth factor receptor (EGFR)                      |
| FACT-L | Functional Assessment of Cancer Therapy – Lung               |
| FISH   | Fluorescence <i>In Situ</i> Hybridization                    |
| HIV    | Human immunodeficiency virus/Human immunodeficiency syndrome |
| IHC    | Immunohistochemistry                                         |
| ILD    | Interstitial Lung Disease                                    |
| INR    | International Normalized Ratio                               |
| IRC    | Independent Review Committee                                 |
| ITT    | Intent-to-Treat                                              |
| MRI    | Magnetic Resonance Imaging                                   |
| NSCLC  | Non–Small Cell Lung Cancer                                   |
| ORR    | Objective Response Rate                                      |
| OS     | Overall Survival                                             |
| pCR    | Pathological complete response                               |
| PD     | Progressive Disease                                          |
| PR     | Partial Response                                             |
| PS     | Physical Status                                              |
| RECIST | Response Evaluation Criteria in Solid Tumors                 |
| SAE    | Serious Adverse Event                                        |
| SD     | Stable Disease                                               |
| SRS    | Stereotactic radiosurgery                                    |
| TKI    | Tyrosine kinase inhibitor                                    |
| ULN    | Upper Limit of Normal                                        |

127

## 128 **1 Study Background and Rationale**

### 129 **1.1 Overview of Non-Small Cell Lung Cancer**

130 Lung cancer is the most common cause of death among various malignancies, worldwide <sup>[1]</sup>. It  
131 is estimated that there are more than 1.4 million new cases and more than 1.2 million deaths  
132 worldwide each year. The World Health Organization estimates that there are about 130,700 new  
133 lung cancer cases and 106,300 deaths each year in China <sup>[2]</sup>, with non-small cell lung cancer  
134 (NSCLC) accounting for about 80% of these cases. With the development of molecular biology  
135 technology, individualized treatment based on molecular typing has significantly improved the  
136 survival and prognosis of patients with advanced lung cancer, with the most representative therapies  
137 as small molecule tyrosine kinase inhibitors targeting EGFR (EGFR-TKIs). According to "*the*  
138 *Guidelines of Chinese Society of Clinical Oncology (CSCO): Lung Cancer*" and "*the Chinese*  
139 *Guidelines for Diagnosis and Treatment of Primary Lung Cancer - National Health Commission of*  
140 *the People's Republic of China*", EGFR-TKIs are recommended for first-line use in patients with  
141 advanced NSCLC who carry EGFR sensitive mutations; and EGFR-TKIs can also be used for  
142 second- or third-line treatment in patients with advanced NSCLC. Studies have confirmed that  
143 patients with NSCLC harbouring EGFR sensitive mutations can benefit from EGFR-TKI therapy <sup>[3-  
144 4]</sup>.

### 145 **1.2 First-line Treatment of EGFR-mutated Non-small Cell Lung Cancer**

#### 146 **1.2.1 Introduction to EGFR**

147 The EGFR (epidermal growth factor receptor) is a tyrosine kinase receptor, whose gene is  
148 located in the p13-q22 region of Chromosome 7, with a full length of 200 kb, consisting of 28 exons  
149 encoding 1,186 amino acids. With a glycoprotein molecular weight of approximately 170 kDa, it is  
150 widely distributed in all tissue cells except mature skeletal muscle cells, body wall endoderm and  
151 hematopoietic tissue. The EGFR family has four structurally similar receptor molecules: ErbB1  
152 (EGFR), ErbB2 (HER2), ErbB3 (HER3), and ErbB4 (HER4), all belonging to the receptor tyrosine  
153 kinases (RTKs). They all contain one extracellular ligand-binding domain, one transmembrane  
154 domain and one cytoplasmic domain with tyrosine kinase activity. Its intracellular region is highly  
155 homologous to the erbB oncogene product <sup>[5]</sup>. The mechanisms of aberrant EGFR activation include  
156 those such as amplification of the receptor itself, overexpression of the receptor ligand, activating  
157 mutations, and lack of negative regulatory pathways, among which the mutational activation of  
158 EGFR is the most significant factor contributing to the aberrant biological behavior of tumor cells.

#### 159 **1.2.2 Implications of EGFR Sensitive Mutations in the Treatment of Lung Cancer**

160 EGFR mutations mainly occur in the first four exons (18-21) of the intracellular tyrosine  
161 kinase (TK) region, which can lead to ligand-independent activation of the EGFR pathway, called  
162 activating mutations, including deletion, substitution, duplication or insertion. Deletion mutations  
163 occur mainly in exon 19 (19DEL), and substitution mutations most commonly occur in L858R of  
164 exon 21, both of which account for approximately 85-90% of the mutations. In the treatment of lung  
165 cancer, specific molecularly targeted drugs have unique advantages because conventional  
166 chemotherapy lacks specificity and achieves limited efficacy while causing greater side effects. For  
167 advanced NSCLC patients with EGFR-sensitive mutations, first-line EGFR-TKI has a significantly  
168 better efficacy than platinum-containing two-drug chemotherapy, with an ORR of 60-80% and a  
169 median PFS of 9-13 months, among which representative agents are gefitinib, erlotinib and icotinib.

#### 170 **1.2.3 Clinical Profile of EGFR-TKI and Icotinib**

171 Antitumor drugs that target EGFR include small molecule EGFR kinase inhibitors (EGFR-  
172 KIs) and anti-EGFR antibodies. Small molecule EGFR-KIs specifically and competitively bind to  
173 the ATP-binding site of the EGFR-kinase functional region, inhibiting its activity and thereby

174 blocking signaling associated with cancer cell proliferation and metastasis.

175 EGFR-TKIs, represented by gefitinib and erlotinib, have made great progress in the treatment  
176 of NSCLC and have become the standard of care for advanced EGFR-mutated NSCLC. It is based  
177 on several randomized controlled studies comparing EGFR-TKIs and chemotherapy in the first-line  
178 treatment of patients with advanced NSCLC carrying EGFR-sensitive mutations, including the  
179 IPASS and OPTIMAL. As published in 2009, IPASS assessed first-line therapy with gefitinib  
180 (Iressa®) versus carboplatin/paclitaxel in Asian patients with lung adenocarcinoma cancer. A total  
181 of 1217 patients were enrolled, in the 261 patients with EGFR mutations who received gefitinib had  
182 increased response rate (71.2% vs 47.3%) and significantly longer PFS (9.5 vs 6.3 months, HR  
183 0.48,  $p < 0.001$ ) compares with chemotherapy<sup>[6]</sup>. OPTIMAL is a randomized, phase III clinical study  
184 sponsored by the Chinese Thoracic Oncology Group (CTONG) comparing the efficacy of erlotinib  
185 versus gemcitabine/carboplatin as first-line therapy in 165 patients with advanced NSCLC carrying  
186 EGFR sensitive mutations. The results showed that the median PFS (13.1 vs 4.6 months; HR 0.16,  
187  $p < 0.0001$ ) and Quality of life were significantly better in erlotinib-treated patients than in those on  
188 chemotherapy, while there was no difference in OS between the two groups<sup>[7]</sup>. However, subgroup  
189 analysis showed that patients receiving chemotherapy alone had a very short survival, with a  
190 median OS of 11.7 months (21 cases), while 20.6 months (33 cases) in the patients receiving EGFR-  
191 TKI only, and up to 30.4 months (94 cases) in the patients receiving chemotherapy after EGFR-TKI  
192 treatment, suggesting that EGFR-TKI makes an important contribution to the improvement of  
193 survival in the patients with EGFR sensitive mutations<sup>[8]</sup>.

194 Similar to gefitinib and erlotinib, icotinib is also an oral epidermal growth factor receptor  
195 tyrosine kinase inhibitor (EGFR-TKI), which belongs to the Category 1.1 new drugs. The  
196 distinctive feature of these drugs is that while inhibiting the growth of tumor cells, they can  
197 significantly improve the quality of life of patients, especially without the hematopoietic inhibitory  
198 effect on bone marrow commonly shown in traditional chemotherapy drugs, and belong to the non-  
199 cytotoxic agents targeting antitumor. A large phase III clinical study showed that icotinib  
200 demonstrated an efficacy of 64.8% and a median PFS of 9.9 months in patients with progressive  
201 lung cancer with histologically confirmed EGFR-sensitive mutations. Subgroup analysis suggested  
202 that the benefit was more pronounced in patients with deletion of exon 19 of the EGFR gene. The  
203 main adverse effects were rash, diarrhea and elevated transaminases, and were well tolerated<sup>[9]</sup>.

204 ICOGEN was a randomised, double-blind, double-dummy, parallel-controlled, multicenter  
205 phase 3 trial designed to assess the safety and efficacy of icotinib and gefitinib in locally advanced  
206 or metastatic NSCLC patients with one or two prior chemotherapies. A total of 399 patients were  
207 enrolled. The primary objective, PFS, was 4.6 months in the icotinib group and 3.4 months in the  
208 gefitinib group without significant difference ( $p = 0.1300$ ), but the absolute value of the icotinib  
209 group was obvious better than that of the gefitinib group. In the FAS, the median OS was 14  
210 months in the icotinib group versus 15.6 months in the gefitinib group, without statistical  
211 difference between the two groups ( $p = 0.7924$ ). Comparing the median time to progression (TTP)  
212 between the two groups, it was 5.2 months for icotinib and 3.7 months for gefitinib,  $p = 0.0653$ .  
213 The objective response was 27.6% vs 27.2% and the disease control rate (DCR) was 75.4% vs  
214 74.9%, respectively<sup>[10]</sup>.

215 As for the safety, the overall incidence of adverse reactions was 60.5% in the icotinib group  
216 and 70.4% in the gefitinib group ( $P < 0.05$ ). Diarrhea, rash, and elevated transaminases were  
217 common, with diarrhea at 18.5% in the icotinib group and 27.6% in the gefitinib group, rash at 40%  
218 in the icotinib group and 49.2% in the gefitinib group, and elevated transaminases at 8% in the  
219 icotinib group and 12.6% in the gefitinib group. Cases with CTCAE grade 3 or higher were 5 in the  
220 icotinib group and 9 in the gefitinib group, and there were no cases in the icotinib group and 4 in the  
221 gefitinib group that withdrew from the study due to adverse reactions.

222 Thus, the results of the ICOGEN study suggest that icotinib is comparable to gefitinib in terms

223 of efficacy, but has a better safety profile than gefitinib. Icotinib is the best option as the first-line  
224 treatment for patients with advanced NSCLC with EGFR-sensitive mutations.

### 225 **1.3 Report about EGFR Mutations in Non-lung Cancer Lesions**

226 Several studies have shown that the EGFR gene is mutated or amplified in a variety of tumor  
227 cells, in addition to non-small cell lung cancer. Dong Xi *et al.* [11] experimentally observed the  
228 expression of EGFR in gastric cancer tissues and explored its clinical significance, and the results  
229 showed that the positive rate of EGFR was 56.5% for the 124 gastric cancer patients, significantly  
230 higher than that of normal gastric tissues adjacent to cancer, and the expression of EGFR was  
231 positively correlated with the depth of tumor infiltration and pathological stage, and they finally  
232 concluded that the high expression of EGFR was associated with the invasion and development of  
233 gastric cancer. Heng Zhou found a 64.9% EGFR-positive mutation rate through pathological  
234 observation of 74 breast cancer patients, and concluded that combined detection of EGFR and  
235 VEGF is important for assessing lymph node metastasis in breast cancer. Yue-Long Cui [12]  
236 investigated the relationship between EGFR intranuclear translocation and cisplatin resistance in  
237 esophageal cancer by detecting EGFR expression in chemotherapy-sensitive and chemotherapy-  
238 resistant esophageal cancer tissues, and found that the mRNA expression of EGFR was significantly  
239 higher in the resistant group than in the sensitive group, and found a significant increase in EGFR  
240 expression in the nucleus of EC9706/DDP cells, suggesting that EGFR intranuclear translocation is  
241 associated with cisplatin resistance in esophageal cancer. Another study has shown that 70-90% of  
242 colorectal cancer patients have high EGFR expression in their tumor tissues [13]. In addition, Shi-  
243 Yun Feng [14] applied immunohistochemistry to detect the expression of PTEN, Ki-67, and EGFR in  
244 thymoma tissues and quantified the results to reveal the pathogenesis of thymoma through the  
245 expression of the three in thymoma. The results showed that the positive expression rate of EGFR  
246 in 52 thymoma tissue specimens was 48.08%, concluding that the positive expression level of  
247 EGFR was closely related to Masaoka staging, i.e., a gradually increased positive expression rate  
248 with the progress of staging. Thus, EGFR is mutated or amplified in a variety of tumor cells, except  
249 in lung cancer, and is strongly associated with tumor progression, metastasis, and drug resistance.

250 Although, EGFR is highly expressed in non-lung cancer malignancies, EGFR mutations are  
251 rare. In addition, EGFR mutations have not been reported in benign pulmonary lesions such as  
252 tuberculosis globules, inflammatory granulomas, hamartoma, teratomas, adenomatous hyperplasia,  
253 and pulmonary consolidation. Based on these results, an EGFR-positive detection result suggests a  
254 high probability of lung carcinogenicity.

### 255 **1.4 Current Status of EGFR Gene Testing**

#### 256 **1.4.1 Difficulties in Tissue Sampling for Clinical EGFR Testing**

257 Currently, tissue specimens remains to be the “gold standard” for EGFR gene testing.  
258 However, in clinical practice, tumor tissue specimens are not available from all patients to complete  
259 the genetic testing. Even in prospective clinical trials, less than 50% of patients had sufficient tumor  
260 tissue specimens for EGFR gene testing. Patients who are old, in poorer physical condition or with  
261 severe underlying disease often refuse to undergo this invasive test due to concerns about the risks  
262 associated with the sampling procedure. In addition, for some patients even with biopsies  
263 performed, the genetic testing is not practical because the tissue specimens may be small or do not  
264 contain enough tumor cells. Moreover, some patients with advanced disease are simply unsuitable  
265 for tissue specimens by invasive biopsy due to factors of tumor growth site. Still, due to the  
266 heterogeneity of the tumor, it is difficult to indicate the overall tumor condition of the patient with  
267 just some local tissue from biopsy. Finally, the genetic status of tumor tissue is constantly changing  
268 throughout the disease process, and it is imperative to screen the EGFR-mutated population through  
269 other simpler but more effective sampling routes to enable better efficacy of EGFR-TKI targeted  
270 therapy.

271 **1.4.2 Value of Blood EGFR Testing**

272 Recent studies have shown that free tumor DNA from peripheral blood of tumor patients has  
273 very similar genetic characteristics to the genome of tumor tissue <sup>[15]</sup>, and the cfDNA content of  
274 tumor patients is 10-fold higher than that of normal subjects. Several studies have explored the  
275 feasibility of peripheral blood cfDNA for EGFR mutation detection, with a consistency of  
276 approximately 59-88% compared with tissue specimens, sensitivity of approximately 43-82%, and  
277 specificity of approximately 90-100% <sup>[16]</sup>. In addition, EGFR mutation status in peripheral blood  
278 cfDNA may correlate well with the efficacy of EGFR-TKIs, with significantly longer PFS in  
279 mutants compared to wild ones <sup>[17]</sup>. These findings suggest that peripheral blood cfDNA can be used  
280 for the detection of EGFR mutations.

281 The presence of tumor heterogeneity results in that small biopsy specimens may not fully  
282 reflect the overall information of the tumor, while ctDNA can compensate to some extent for the  
283 bias of genetic testing due to tumor heterogeneity. In addition, dynamic tissue specimen sampling is  
284 very difficult in clinical practice, and ctDNA testing can better enable the timely, quantitative,  
285 dynamic detection of genetic variation.

286 **1.4.3 Development of Molecular Diagnostic Techniques for EGFR Mutations**

287 In 2014 the European Medicines Agency (EMA) approved ctDNA testing to detect EGFR  
288 mutation status, and in 2015 the China Food and Drug Administration (CFDA, already renamed to  
289 NMPA) approved the use of ctDNA specimens obtained from blood (plasma) for EGFR testing  
290 when tissue specimens are not available. The traditional classical Sanger sequencing method is the  
291 gold standard for DNA sequencing <sup>[18]</sup>, with sequencing lengths up to 1000 bp and almost 100%  
292 accuracy, but suffers from low throughput, high cost and time consuming, which seriously affect its  
293 large-scale application. As assays continue to advance, novel but more efficient and comprehensive  
294 high-throughput assays, known as Next-Generation Sequencing (NGS), have emerged. The core  
295 principle of NGS technology is sequencing while synthesizing, and its basic steps include library  
296 preparation, generation of monoclonal DNA clusters, and sequencing reactions <sup>[19]</sup>. Compared with  
297 the first generation sequencing technology (Sanger), the next generation sequencing technology has  
298 the following characteristics: (1) high throughput. Next-generation sequencing technology does not  
299 rely on traditional capillary electrophoresis, and its sequencing reactions are performed on the chip,  
300 allowing millions of sites on the chip to be sequenced simultaneously; (2) lower cost. The cost per  
301 Mb base of next-generation sequencing technology is 96.0%-99.9% lower than that of Sanger  
302 sequencing; (3) high sensitivity; (4) short read length, which does not facilitate splicing during  
303 subsequent data analysis; and (5) the polymerase chain reaction (PCR) process may introduce bias  
304 and mismatch <sup>[20]</sup>.

305 In contrast, the established and commonly used method for blood EGFR detection is the  
306 amplification refractory mutation system (ARMS) method, which has a sensitivity of 65%-88% and  
307 a specificity of 98%-100% for detecting plasma EGFR-sensitive mutation compared to EGFR  
308 detection in tumor tissues <sup>[21-23]</sup>. ADx-Super-ARMS technology (Amoy Diagnostics Co., Ltd.)  
309 makes liquid biopsy for EGFR mutation more sensitive and easier to implement, providing results  
310 within 120 minutes, and can be widely used in a variety of diagnostic laboratories, which is  
311 currently the only one in China and has higher sensitivity than similar foreign technologies. Droplet  
312 Digital Polymerase Chain Reaction (ddPCR) is a new generation of molecular detection technique,  
313 which involves dividing the reaction system containing nucleic acid molecules into thousands of  
314 nano-scale water-in-oil droplets before conventional PCR amplification, then performing PCR  
315 amplification for each droplet simultaneously, and collecting the fluorescence signal in each droplet  
316 in turn after the amplification is completed <sup>[24]</sup>. Because of its unique principle, it has the advantages  
317 of high sensitivity, high specificity and absolute quantification, and can truly realize "liquid biopsy"  
318 of tumor by combining with peripheral blood circulating tumor DNA testing. The ddPCR  
319 technology can accurately detect plasma EGFR mutation, which is more helpful for accurate



320 screening of the population benefiting from EGFR-TKI-targeted therapy, timely monitoring of  
321 efficacy and early detection of drug resistance <sup>[25]</sup>.

322 In clinical practice, some people with imaging implied lung adenocarcinoma may usually  
323 refuse or are unable to undergo puncture biopsy to obtain specimens for pathological diagnosis and  
324 genetic testing, while the use of ctDNA to detect EGFR mutations is clinically feasible. Therefore,  
325 the aim of this study is to investigate whether the administration of EGFR-TKI can benefit the  
326 population when their potential EGFR mutations are detected using ctDNA in the absence of known  
327 pathological status.

328

329

330

## 331 **2 Study Objective**

332 The aim of this study is to observe the efficacy of icotinib in treatment-naive patients clinically  
333 diagnosed with peripheral lung cancer, with unknown pathology status, and positive for blood  
334 EGFR sensitive mutations (EGFR 19del and/or 21L858R) test (positive for any of the tests by  
335 SARMS, ddPCR, and NGS).

### 336 **2.1 Primary Objective**

337 To observe the ORR of icotinib in treatment-naive patients clinically diagnosed with peripheral  
338 lung cancer, with unknown pathology status, and positive for blood EGFR sensitive mutation  
339 (EGFR 19del and/or 21L858R) test (positive for any of the tests by SARMS, ddPCR, and NGS).

### 340 **2.2 Secondary Objective**

341 To explore the consistency of positive blood epidermal growth factor receptor-sensitive  
342 mutations (EGFR 19del and/or 21L858R) (positive for any of the tests by SARMS, ddPCR, and  
343 NGS) with pathological confirmation of lung cancer.

344 To observe the PFS, OS and DCR of icotinib in treatment-naive patients diagnosed with lung  
345 cancer based on imaging data, with unknown pathology status, and positive for blood EGFR  
346 sensitive mutation (EGFR 19del and/or 21L858R) test (positive for any of the tests by SARMS,  
347 ddPCR, and NGS).

348 To analyze the consistency among SARMS, ddPCR, and NGS tests.

### 349 **2.3 Exploratory Objective**

350 Dynamic monitoring of multiple mutant genes;

351 Detection of biomarkers in patients' urine;

352

### 3 Study Design

#### 3.1 Study Design and Plan

This is a prospective, open-label, single-arm, multicenter clinical study, aiming to observe the efficacy of icotinib in treatment-naïve patients clinically diagnosed with peripheral lung cancer, with unknown pathology status, and positive for blood EGFR sensitive mutations (EGFR 19del and/or 21L858R) test (positive for any of the tests by SARMS, ddPCR, and NGS).

This trial includes two groups. The first group includes patients who are diagnosed with peripheral lung cancer based on radiographic data, and whose tissue specimens are not obtained for pathological diagnosis due to □ technical reasons (e.g., a tiny nodule, etc.); □ the patient's own reasons (e.g., no desire for tissue biopsy); or □ failure to collect pathological tissue from the patients after a puncture or multiple punctures and a positive epidermal growth factor receptor (EGFR) sensitive mutation (EGFR 19del and/or 21L858R) by a blood test (positive in any of the tests by SARMS, ddPCR, and NGS). Patients in this group will be treated with icotinib until PD.

The second group includes subjects who agree to undergo a pathological biopsy and whose specimens are likely to be obtained, but in cases where the pathological diagnosis and tissue EGFR mutation results are not known, a blood EGFR mutation test will first be performed (positive in any of the tests by SARMS, ddPCR, and NGS) and those who are positive will be given icotinib after a puncture. If a subject's pathological diagnosis and tissue EGFR mutation are confirmed during the treatment, the investigator and the subject will jointly decide whether to continue treatment with icotinib until PD. Patients with a negative blood test (not enrolled) will undergo a puncture to collect pathological tissue if available.

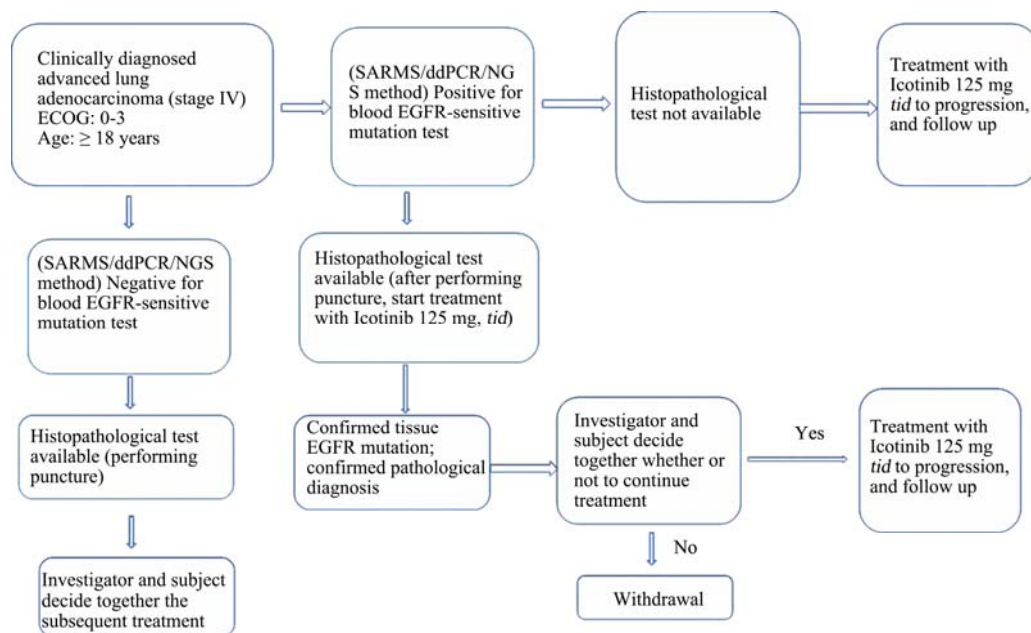

374

#### 3.2 Selection of Subjects

Eligible patients were diagnosed with stage IV peripheral lung cancer by the investigator based on radiographic data, who are unable to receive radical resection or radical radiotherapy (including conventional radiotherapy and SBRT) and positive for EGFR sensitive mutation (EGFR 19del and/or 21L858R) by a blood test (positive in any of the tests by SARMS, ddPCR, and NGS).

##### 3.2.1 Inclusion Criteria

– **Disease-related inclusion criteria:**

381

- 382 – Patients who are diagnosed with peripheral lung cancer and whose pathological diagnosis  
383 is not yet confirmed;
- 384 – Positive EGFR sensitive mutation (EGFR 19del and/or 21L858R) by a blood test (positive  
385 in any of the tests by SARMS, ddPCR, and NGS);
- 386 – Inability to undergo radical surgery or radical radiotherapy;
- 387 – Patients who have not received anti-tumor treatments such as surgery, chemotherapy,  
388 radiotherapy, and biological therapy;
- 389 – Palliative radiotherapy to bone metastases is allowed, provided that there is no ongoing  
390 radiotherapy-related toxicity;
- 391 – Age  $\geq$  18 years and expected survival time  $>$  12 weeks;
- 392 – ECOG 0-3;
- 393 – Radiographically evaluable lesions and at least one unidimensionally measurable lesion  
394 with the maximum diameter  $\geq$  10 mm by spiral CT according to the Response Evaluation  
395 Criteria in Solid Tumors (RECIST1.1). None of the lesions that have received radiotherapy  
396 can be used as a target lesion.
- 397 – **Hematology, biochemistry and organ function:**
- 398 – Bone marrow: Absolute neutrophil count (ANC)  $\geq$   $1.5 \times 10^9/L$ ; platelets  $\geq$   $100 \times 10^9/L$ ;
- 399 – Hemoglobin  $\geq$  8 g/dL;
- 400 – Liver: Serum bilirubin  $\leq$   $1.5 \times$  ULN; aspartate aminotransferase (AST) and alanine  
401 aminotransferase (ALT)  $\leq$   $2.5 \times$  ULN (or AST & ALT  $\leq$   $5 \times$  ULN if there is liver  
402 metastasis);
- 403 – Kidney: Serum creatinine  $\leq$   $1.5 \times$  ULN;
- 404 – All laboratory values should be stable in the absence of ongoing supportive treatment;
- 405 – Asymptomatic brain metastases, or symptomatic brain metastases that are well controlled  
406 with local therapy (surgery and/or radiotherapy) and requiring no hormone maintenance  
407 therapy;
- 408 – No malabsorption or other gastrointestinal disorders that may affect drug absorption.
- 409 – **General inclusion criteria:**
- 410 – Subjects understand and voluntarily sign a written informed consent form (ICF) prior to  
411 any trial procedures;
- 412 – Subjects can take oral drugs;
- 413 – Women of childbearing potential must have a negative pregnancy test within 7 days before  
414 starting treatment; all patients (male or female) should use adequate barrier contraception  
415 throughout the treatment and for 4 weeks after the end of treatment.

### 416 3.2.2 Exclusion Criteria

- 417 – Any systemic anti-tumor treatment for lung cancer, including cytotoxic drug therapy,  
418 targeted drug therapy (including tyrosine kinase inhibitors or monoclonal antibodies),  
419 immunotherapy, or anti-tumor treatment received in other clinical trials;
- 420 – Local radiotherapy for lung cancer;
- 421 – Known allergy to icotinib or any of the ingredients in this product;

- 422 – Presence of large symptomatic pleural effusions, pericardial effusions, ascites, etc.
- 423 – Evidence of a severe or uncontrolled systemic disease (e.g., unstable or uncompensated
- 424 respiratory, cardiac, hepatic, or renal disease) as judged by the investigator;
- 425 – Any unstable systemic disease (including active infection, uncontrolled hypertension,
- 426 unstable angina, angina within the last 3 months, congestive heart failure ( $\geq$  New York
- 427 Heart Association [NYHA] Class II), myocardial infarction (within 6 months prior to
- 428 enrollment), serious arrhythmia requiring medication, hepatic, renal or metabolic diseases);
- 429 – Patients who have had other cancers other than NSCLC within 5 years prior to the start of
- 430 treatment in this study. Cervical carcinoma in situ, cured basal cell carcinoma, and
- 431 epithelial tumors of the bladder [including Ta and Tis] are excluded;
- 432 – Previous interstitial lung disease, drug-induced interstitial disease, radiation pneumonitis
- 433 requiring hormone therapy, or any active interstitial lung disease with clinical evidence;
- 434 – Presence of idiopathic pulmonary fibrosis on CT scan at baseline;
- 435 – Ocular inflammation or infection that is not completely controlled, or any condition that
- 436 may lead to one of these eye conditions;
- 437 – Diagnosed with Human immunodeficiency virus (HIV) infection;
- 438 – Participation in other clinical trials of anti-tumor drugs within 4 weeks prior to enrollment;
- 439 – Previous history of definite neurological or psychiatric disorders, including epilepsy or
- 440 dementia;
- 441 – Pregnant or lactating women
- 442 – Evidence of any other significant clinical or laboratory findings that make the patient
- 443 unsuitable for the study;
- 444 – Patients who have previously been registered to receive this study treatment or withdrew
- 445 from this study;
- 446 – Patients with chronic toxicity  $\geq$  NCI-CTC 4.0 Grade 2 (excluding alopecia) who have not
- 447 been cured;
- 448 – Other conditions that are considered inappropriate by the investigator.

### 449 **3.3 Sample Size and Study Duration**

450 A total of 120 patients are planned for this study. The study will take about 15 months based on  
451 an enrollment of 8 subjects per month.

### 452 **3.4 Withdrawal of Subjects from the Study**

453 Withdrawal refers to a situation where patients discontinue their treatment for various reasons  
454 during the clinical study.

455 A patient will withdraw from the study if:

- 456 • The patient or his/her legal representative requests withdrawal;
- 457 • Continued participation will be detrimental to the patient's health, in the opinion of the
- 458 investigator;

459 A patient must withdraw from the study if:

- 460 • Experiences other serious adverse reactions that, in the opinion of the principal investigator or
- 461 his or her designee, require treatment interruption;

- 462 • Has poor compliance;
- 463 • Suffers from other complications that, in the opinion of the investigator, will significantly affect  
464 the evaluation of the patient's clinical condition and require discontinuation of treatment in this  
465 study;
- 466 • Suffers from other malignancies that require treatment;
- 467 • Lost to follow-up;
- 468 • Uses prohibited drugs or other substances that, in the opinion of the investigator, may cause  
469 toxicity or deviation of the study results;
- 470 • Died.

471 All patients who withdraw from the study should have the reason for withdrawal recorded on  
472 the case report form (CRF) and in the medical records.

473 All patients withdrawn due to adverse events or abnormal laboratory values should be  
474 followed up until the adverse events are recovered or stable, and the subsequent results of these  
475 events should be recorded. If any patient dies during the trial or within 30 days after completion of  
476 the trial, the investigator should be informed. The cause of death must be recorded in detail on the  
477 *Serious Adverse Event (SAE) Report Form* within 24 hours.

## 478 **3.5 Treatment Plan**

### 479 **3.5.1 Treatment Procedures**

480 Blood samples will be collected from patients having signed the informed consent form for a  
481 plasma ctDNA test and other tests.

482 The steps of the ctDNA test are as follows:

483 1. Prepare three 10 ml STRECK DNA BCT disposable vacuum cell-free blood collection tubes or  
484 three 8 ml EDTA anticoagulant vacuum blood collection tubes and twelve to eighteen 2 ml enzyme-  
485 free EP tubes before drawing blood. Stick a label on each tube, indicating the trial name, subject  
486 screening ID, subject initials, site name, visit period, and date of blood draw.

487 2. At screening, collect whole blood samples using a 10 ml STRECK DNA BCT disposable  
488 vacuum cell-free blood collection tube, 8 ml per tube and 3 tubes in total, and complete the  
489 corresponding specimen collection record. Transfer these tubes to each central laboratory for  
490 plasma separation within 14 days and for further processing and testing according to the standard  
491 operating procedures of SARMS, ddPCR, and NGS tests;

492 3. At each visit during treatment and at the end of treatment, the following two options are  
493 acceptable depending on the availability of 4°C centrifuges and -80°C refrigerators at each site:

494 (1) If 4°C centrifuge and -80°C refrigerator are not available, collect whole blood samples  
495 using a 10 ml STRECK DNA BCT disposable vacuum cell-free blood collection tube, 8 ml per tube  
496 and 3 tubes in total, and complete the corresponding specimen collection record. Transfer these  
497 tubes to each central laboratory for plasma separation within 14 days;

498 (2) If 4°C centrifuge and -80°C refrigerator are available, collect whole blood samples using  
499 an 8 ml EDTA anticoagulant blood collection tube, 8 ml per tube and 3 tubes in total, and separate  
500 the whole blood within 2 hours: ① centrifuge the tubes containing whole blood at 3500 rpm for 10-  
501 15 min using a 4°C centrifuge; ② aspirate the upper plasma with a pipette and dispense it into 2 ml  
502 EP tubes, about 2 ml of plasma/tube; ③ transfer the lower tangible cell precipitate (i.e. the white  
503 blood cell layer between yellow plasma and red blood) after centrifugation into 2 ml EP tubes and  
504 complete the label on each EP tube; ④ store the above EP tubes containing plasma and tangible cell

505 precipitate and the lower red blood cells after centrifugation in a -80°C refrigerator and complete  
506 the label and the specimen storage record; and □ transport the stored blood samples to each central  
507 laboratory via a designated transportation company at a low temperature within the specified time  
508 and store them in a -80°C refrigerator.

509 (3) Further process and test the samples according to the standard NGS testing procedures.

510 Patients meeting the inclusion and exclusion criteria will start medication.

511 Patients are required to visit the clinic for evaluation, and make a return visit 4 weeks after the  
512 start of treatment and then every 8 weeks for routine examinations until tumor progression or  
513 occurrence of intolerable toxicity.

514 After the investigators complete the study and record disease progression at each stage, it is  
515 required to contact each patient or his/her family or current treating physician by telephone at least  
516 every 12 weeks to collect long-term follow-up information on survival. Patients who discontinue  
517 study treatment for any reason other than progression (except for withdrawal of consent, loss to  
518 follow-up, and death) should continue to receive objective tumor evaluation every 12 weeks to  
519 collect information on disease progression.

### 520 3.5.2 Dose Reduction and Discontinuation of Icotinib

521 The dose of icotinib hydrochloride can be reduced or discontinued at any time during the study  
522 due to adverse events.

- 523 • Icotinib is well tolerated in clinical application and discontinuation is generally not  
524 required. According to the literature, the incidence of interstitial lung disease (ILD) in  
525 Eastern populations treated with gefitinib and erlotinib is 2-3% and 1-2%, respectively. No  
526 development of ILD was observed in the ICOGEN clinical study.
- 527 • Patients with ILD often present with acute dyspnea, accompanied by cough, slight fever,  
528 respiratory discomfort, and arterial oxygen desaturation. The symptoms can develop very  
529 severely in the short term and lead to death. Radiography often reveals pulmonary  
530 infiltrates or interstitial ground-glass opacities.
- 531 • Patients should be closely monitored for signs of ILD during the treatment by their treating  
532 physician. If any patient develops a new acute or progressively worsening dyspnea or  
533 cough, treatment with icotinib should be interrupted and relevant examinations should be  
534 performed immediately. Once ILD is confirmed, the medication should be discontinued  
535 and the patient should be treated accordingly.
- 536 • Rash and diarrhea are the main adverse reactions associated with icotinib hydrochloride.  
537 Other known adverse reactions include dry skin, fatigue, pruritus, nausea, vomiting, and  
538 abdominal pain. The dose can be reduced according to the most severe systemic toxicity, as  
539 shown in Table 1. All toxicities should be graded according to NCICTC-AE 4.0.
- 540 • In case of any AE considered by the investigator to be related to the study drug (see Table  
541 2), the treatment should be discontinued until the AE resolved and restarted at a reduced  
542 dose of icotinib hydrochloride. The daily dose of icotinib hydrochloride should be reduced  
543 as shown in Table 1.

544 **Table 1 Dose Reduction Regimen**

| Initial Dose            | First Dose Reduction    | Second Dose Reduction |
|-------------------------|-------------------------|-----------------------|
| 375 mg/day (125 mg Tid) | 250 mg/day (125 mg Bid) | None                  |

545 The following guidelines in Table 2 provide an overview of dose modification methods  
546 according to the most common toxic side effects.

547  
548

**Table 2 Guidelines for Dose Modification and Management of Toxic Side Effects Associated with Icotinib**

| Toxicity         | Grade                                                     | Treatment                                                                                                                                    | Dose Modification                                                                                                                                      |
|------------------|-----------------------------------------------------------|----------------------------------------------------------------------------------------------------------------------------------------------|--------------------------------------------------------------------------------------------------------------------------------------------------------|
| Keratitis        | Grade 2                                                   | Interrupt treatment<br>Ophthalmologic evaluation                                                                                             | Interrupt until resolved and restart at a reduced dose.<br>Patients should continue to receive routine ophthalmologic evaluation during the treatment. |
|                  | ≥ Grade 3                                                 | Discontinue treatment and seek advice from an ophthalmologist.                                                                               |                                                                                                                                                        |
| Diarrhea         | Grade 1                                                   | No intervention required                                                                                                                     | None                                                                                                                                                   |
|                  | Grade 2                                                   | Loperamide (initial dose 4 mg, followed by 2 mg every 2-4 hours until no diarrhea for 12 hours)                                              | None**                                                                                                                                                 |
|                  | Grade 3                                                   |                                                                                                                                              | Interrupt until resolved to ≤ Grade 1, and restart at a reduced dose.                                                                                  |
|                  | Grade 4                                                   | Discontinue treatment                                                                                                                        |                                                                                                                                                        |
| Rash             | Grade 1                                                   | No intervention required                                                                                                                     | None                                                                                                                                                   |
|                  | Grade 2                                                   | Any of the following medications:                                                                                                            | None**                                                                                                                                                 |
|                  | Grade 3                                                   | Minocycline <sup>a</sup> , topical tetracycline or clindamycin, topical silver sulfadiazine, diphenhydramine, oral prednisone (short course) | Interrupt until resolved to ≤ Grade 2, and restart at a reduced dose.                                                                                  |
|                  | Grade 4                                                   | Discontinue treatment                                                                                                                        |                                                                                                                                                        |
| Other toxicities | ≥ Grade 2 prolonged and clinically significant toxicities | Treat as appropriate                                                                                                                         | Interrupt until resolved to ≤ Grade 1, and restart at a reduced dose.                                                                                  |

549 \* Patients should discontinue the study if they have not recovered from the toxicity after 14 days of  
550 discontinuation;

551 \* Patients should discontinue the study if the toxicity is still intolerable or remains at Grade 3 or above after  
552 dose reduction. Dose modifications are allowed up to 2 times for each group. See Table 2 for details

### 553 3.5.3 Concomitant Therapies and Smoking

554 All concomitant medications and treatments (including start/end dates and indications) must be  
555 recorded in the patient's raw data and in the appropriate sections of the case report form (CRF).

556 All patients concomitantly taking drugs metabolized by CYP3A4 should be closely monitored  
557 for possible adverse reactions due to these drugs.

558 Smoking will affect the pharmacokinetics of icotinib. The smoking status of patients should be  
559 recorded, including the number of cigarettes smoked and duration per day, throughout the treatment.  
560 All patients are advised to quit smoking during the course of treatment.

### 561 3.5.4 Discontinuation Criteria

- 562 ● When an adverse event occurs and it is considered difficult to continue the trial;
- 563 ● When the underlying disease (or symptom) becomes worsened and it is considered difficult  
564 to continue the trial;
- 565 ● When a subject is found not to meet the inclusion or exclusion criteria after administration;
- 566 ● When a serious deviation from the trial protocol is found;
- 567 ● When it is considered difficult to comply with the trial protocol;



- 568       • When a subject requests withdrawal from the trial;  
569       • When the investigator considers it difficult to continue the trial.

### 570   **3.5.5 Concomitant Medications**

#### 571   **3.5.5.1 Prohibited Medications**

- 572       • Bevacizumab and all drugs targeting VEGF, VEGFR, or EGFR (including registered and  
573       investigational drugs).
- 574       • All other anti-tumor drugs except for icotinib, including investigational drugs (e.g.,  
575       investigational antibiotics, antiemetics, etc.) and Chinese herbal medicines indicated for  
576       treatment of tumors.

#### 577   **3.5.5.2 Permitted Medications**

- 578       • Non-anti-tumor Chinese herbal medicines or acupuncture, vitamins/trace elements are  
579       permitted without affecting the study endpoints, at the discretion of the investigator.
- 580       • Patients may also receive symptom reduction and supportive treatments for pre-existing  
581       diseases.

### 582   **3.5.6 Treatment Compliance**

583       The dose of icotinib taken and the date of administration should be recorded in the CRF for  
584       each patient in each course of treatment. Reasons for dose delay, dose reduction or missed dose  
585       should also be recorded in the CRF.

586       Patient compliance with treatment and trial protocol includes voluntary compliance with all  
587       aspects of the protocol, including compliance with therapeutic drugs, compliance with all blood  
588       collections required for safety evaluation, and compliance with regular postoperative follow-ups.  
589       Patients who do not take the drug on time, or do not cooperate with examinations, or do not return  
590       on time may be excluded from the study according to the opinion of the principal investigator.  
591       Patients may withdraw from the study after discussion with and obtaining consent from the  
592       principal investigator if they have discontinued the treatment for >2 weeks due to adverse reactions  
593       that cannot be improved or cannot be relieved even with optimal symptomatic and supportive  
594       treatments.

## 595   **3.6 Study Endpoints**

596       The primary efficacy endpoint of this study is objective response rate (ORR = CR + PR).

597       The secondary endpoints include: consistency among SARMS, ddPCR, and NGS tests;

598       Consistency between positive blood EGFR sensitive mutation and pathologically confirmed  
599       lung cancer;

600       Progression-Free Survival (PFS)

601       Overall Survival (OS)

602       Disease Control Rate (DCR)

### 603   **3.6.1 Efficacy Endpoints**

604       **Objective response rate (ORR):** ORR will be determined separately for all patients according  
605       to RECIST 1.1. Incomplete or partial tumor evaluation results will not be used to calculate response  
606       rates unless the lesions included in the above examinations have demonstrated disease progression.  
607       It includes cases of complete response (CR) and partial response (PR).

608       **Progression-free survival (PFS):** PFS is defined as the time from the date of randomization

609 until the occurrence of disease progression, which could be a progression confirmed by radiography  
610 or death prior to disease progression. Patients who are alive and have not progressed as of the date  
611 of analysis will be censored at the date of their last radiographic evaluation.

612 **3-year OS rate and 5-year OS rate:** OS is defined as the time from the administration of  
613 study drug until death due to any cause. The 3-year OS rate refers to the probability that the patient  
614 is still alive at 3 years from the administration of the study drug. The 5-year OS rate refers to the  
615 probability that the patient is still alive at 5 years from the administration of the study drug.

616 Tumor response and disease progression will be assessed by the investigator according to  
617 RECIST criteria.

618 Duration of response was calculated in all patients with confirmed PR or CR according to  
619 RECIST criteria. Duration of response is measured from the time of first documentation of PR or  
620 CR until death or progression of disease (whichever is earlier). Patients who are alive and have no  
621 PD as of the date of analysis will be censored at the date of their last imaging evaluation.

### 622 **3.6.2 Safety Measures**

623 All patients who have received at least one dose of study drug will be considered as the valid  
624 population for safety analysis. Physical examination results, vital signs, adverse events and  
625 laboratory abnormalities of patients will be summarized. Adverse events should be reported and  
626 graded according to the NCI Common Terminology Criteria for Adverse Events (CTCAE) Version  
627 4.0.

### 628 **3.6.3 Study Period**

629 The start date of study is defined as the date of signing ICFs.

#### 630 **3.6.3.1 Study Visit**

631 The screening visit should be performed within 28 days prior to the start of study drug.

632 The treatment period refers to the period from the first dose of study drug to the withdrawal of  
633 study drug of the patient.

634 The end-of-treatment visit should be performed within 7 days (+/- 5 days) after the patient  
635 discontinues study drug for reasons other than death and loss to follow-up.

636 Patients who discontinue study drug will enter the post-treatment follow-up period. This period  
637 should include contact with the patient every 3 months until death to collect data on overall  
638 survival.

#### 639 **3.6.3.2 Imaging Evaluation**

640 Screening period: CT scans of the chest and abdomen must be performed at least within 28  
641 days before enrollment, and tumor measurements should be recorded in the CRF according to  
642 RECIST criteria.

643 Treatment period: The first response evaluation will be performed 4 weeks after the start of  
644 treatment, followed by evaluation of target lesions by CT scan every 8 weeks, and tumor  
645 measurements will be recorded in the CRF according to RECIST criteria. Other examinations will  
646 be performed as indicated by symptoms.

647 After the end of treatment: CT scans of target lesions should be performed at least every 8  
648 weeks +/- 5 days, and tumor measurements should be recorded in the CRF according to RECIST  
649 criteria. Other examinations will be performed as indicated by symptoms.

#### 650 **3.6.3.3 Observation and Measurement**

651 Subjects participating in this study will be evaluated according to the study flow chart and

652 subsequent outline in the appendix.

### 653 **3.7 Study Procedures**

#### 654 **3.7.1 Screening Period**

655 Within 28 days prior to the start of administration of study drug

- 656 • ICFs should be signed prior to any study-related procedure;
- 657 • The 12-lead ECG at baseline should be performed and signed by the investigator;
- 658 • Brain MRI should be performed to rule out brain metastases only if there are neurological  
659 symptoms (suggestive of brain metastases).
- 660 • Tumor assessment at baseline: CT scan containing at least target lesions should be  
661 performed, and it can be performed within 28 days prior to the start of administration of  
662 study drug.

663 Screening Period – within 7 days prior to the start of administration of study drug

- 664 • Stage and grading of the primary tumor at initial diagnosis and the current stage to be  
665 recorded/confirmed;
- 666 • Demographics, complete medical history, surgical history, and smoking history, including  
667 prior anticancer therapy;
- 668 • Complete physical examination (PE), including ECOG performance status score, height,  
669 body weight and detailed systemic examination;
- 670 • Vital signs (including heart rate, blood pressure, respiratory rate, and temperature);
- 671 • All concomitant diseases, concomitant medications and their indications to be recorded;
- 672 • Hematology: hemoglobin, hematocrit, platelet count, white blood cell count and  
673 classification, including absolute neutrophil and lymphocyte counts;
- 674 • Biochemistry panel: including blood glucose, calcium, phosphorus, sodium, potassium,  
675 chloride, creatinine, blood urea nitrogen (BUN), total protein, albumin, alanine  
676 aminotransferase (ALT), aspartate aminotransferase (AST), alkaline phosphatase, total  
677 bilirubin, etc.;
- 678 • Urinalysis: including specific gravity, pH value, urine glucose, urine protein and occult  
679 blood;
- 680 • A total of 24 ml whole blood to be collected for molecular marker test;

#### 681 **3.7.2 Treatment Period**

682 Response evaluation will be performed 4 weeks after the start of treatment and every 8 weeks  
683 thereafter. The laboratory test, imaging evaluation and quality of life assessment during treatment  
684 are shown in the flow chart.

Clinical Study of the Efficacy of Icotinib in Patients with Clinically Diagnosed Lung Cancer Carrying EGFR sensitive mutations Detected by ctDNA Testing

|                                                             | Pre-treatment      | Treatment period |                                 | End of treatment <sup>12</sup> | Post-progression follow-up <sup>13</sup>                                                                                                                                                                     |
|-------------------------------------------------------------|--------------------|------------------|---------------------------------|--------------------------------|--------------------------------------------------------------------------------------------------------------------------------------------------------------------------------------------------------------|
|                                                             |                    | 4 Weeks          | Every 8 weeks until progression |                                |                                                                                                                                                                                                              |
| Activities                                                  | Screening period   | 28 ± 7 days      | Every 8 weeks ± 7 days          | within 7 days                  | The following information will be collected via telephone visit or clinic visit:<br><br>1. Survival information of patients;<br><br>2. Changes in anticancer treatment regimens, including all new therapies |
| ICFs of patients                                            | X (within 28 days) |                  |                                 |                                |                                                                                                                                                                                                              |
| Medical history <sup>1</sup>                                | X (within 7 days)  |                  |                                 |                                |                                                                                                                                                                                                              |
| Complete physical examination <sup>2</sup>                  | X (within 7 days)  |                  |                                 |                                |                                                                                                                                                                                                              |
| Inclusion/exclusion criteria                                | X                  |                  |                                 |                                |                                                                                                                                                                                                              |
| 12-lead ECG                                                 | X (within 28 days) | X                | X                               | X                              |                                                                                                                                                                                                              |
| Vital signs and ECOG score                                  | X                  | X                | X                               | X                              |                                                                                                                                                                                                              |
| CT or MRI scan of the brain <sup>3</sup>                    | X (within 28 days) | X                | X                               |                                |                                                                                                                                                                                                              |
| Chest and abdomen CT or B-scan ultrasonography <sup>4</sup> | X (within 28 days) | X                | X                               |                                |                                                                                                                                                                                                              |
| Imaging Evaluation <sup>5</sup>                             | X (within 28 days) | X                | X (every 8 weeks)----->         |                                |                                                                                                                                                                                                              |
| Hematology <sup>6</sup>                                     | X (within 7 days)  | X                | X                               | X                              |                                                                                                                                                                                                              |
| Biochemistry panel <sup>7</sup>                             | X (within 7 days)  | X                | X                               | X                              |                                                                                                                                                                                                              |
| Urinalysis <sup>8</sup>                                     | X (within 7 days)  | X                | X                               | X                              |                                                                                                                                                                                                              |
| Blood biomarkers <sup>9</sup>                               | X (within 7 days)  | X                | X                               | X                              |                                                                                                                                                                                                              |
| Tissue samples (paraffin-embedded) <sup>10</sup>            | X                  |                  |                                 |                                |                                                                                                                                                                                                              |
| PRO-Fact L and LCS questionnaire <sup>11</sup>              | X                  | X                | X                               | X                              |                                                                                                                                                                                                              |
| Toxicity/AE evaluation                                      |                    |                  | ----->                          |                                |                                                                                                                                                                                                              |
| Concomitant diseases and medications                        |                    |                  | ----->                          |                                |                                                                                                                                                                                                              |

685

686

687

688

- 689 1. Complete medical history, demographics, past surgical history, concomitant medications, concomitant diseases, allergic history, and smoking  
690 history.
- 691 2. Complete physical examination, ECOG performance status score, NYHA heart disease classification, height, body weight, vital signs and detailed  
692 examination of various systems of the body.
- 693 3. Only patients with neurological symptoms at baseline are required to undergo CT scan/MRI of the head to rule out brain metastases.
- 694 4. Patients with abdominal color Doppler ultrasonographic findings or symptoms suggestive of abdominal visceral metastasis at baseline are required  
695 to undergo abdominal CT scan/MRI evaluation.
- 696 5. Tumor evaluation and CT scan during treatment should be performed at 4 weeks after treatment for the first time, and then every 8 weeks  
697 thereafter. In case of withdrawal of a patient due to progression of disease, it will not be required to repeat the CT scan at the end of study visit.
- 698 6. Hematology includes: hemoglobin, hematocrit, platelet count, white blood cell count, absolute neutrophil count, and absolute lymphocyte count.
- 699 7. Biochemistry panel includes: blood glucose, calcium, phosphorus, sodium, potassium, chloride, creatinine, blood urea nitrogen, total protein,  
700 albumin, alanine aminotransferase, aspartate aminotransferase, alkaline phosphatase, total bilirubin, etc.
- 701 8. Urinalysis includes: specific gravity, pH, urine glucose, urine protein, and occult blood. Urinalysis will be required at screening, and urine dipstick  
702 test will be performed during subsequent course of treatment.
- 703 9. A total of 20 ml whole blood will be retained before treatment, during treatment and at the end of treatment respectively. If the patient continues  
704 the administration of Icotinib after progression of disease, 20 ml whole blood will be retained when the investigator determines that there is any  
705 progression of disease.
- 706 10. A total of 10 slices of 5 um tissue samples (paraffin-embedded) will be retained at screening.
- 707 11. The patient self-rating outcome questionnaires FACT-L and LCS (Version 4) should be completed prior to all other study procedures.
- 708 12. Provided that a subject discontinues the study drug for any reason (except death or loss to follow-up), an end-of-treatment evaluation should be  
709 performed at the time of discontinuation. If treatment is discontinued for any reason other than progression of disease (except for withdrawal of  
710 informed consent of the patient), imaging evaluation should be performed within 7 days and every 8 weeks thereafter until progression of disease.  
711 If the investigator considers that the patient can continue to benefit from Icotinib treatment, administration at the original dose can be continued  
712 until progression of disease is determined by the investigator, and tumor evaluation should be performed every 8 weeks during treatment.

713 13. Follow-up after progression of disease should be performed every 3 months until death of patient.

714 **3.7.3 After the End of Treatment**

715 After the end of treatment, examination should be performed every 8 weeks until progression  
716 of disease (see the flow chart).

717 \* If the investigator believes that the patient will continue to benefit from icotinib treatment  
718 after determining disease progression based on RECIST criteria, the same dose of icotinib can be  
719 continued until the investigator determines disease progression. In the period, the patient cannot  
720 receive any other concomitant anti-tumor treatment. CT scan should be performed every 8 weeks  
721 during treatment to evaluate target lesions, and other examinations should be performed as indicated  
722 by symptoms.

723 **3.7.4 Interim Visits**

724 Interim visits should be performed as clinically indicated. Associated clinically significant  
725 laboratory abnormalities and adverse events should be recorded in the CRF and original data. If  
726 multiple laboratory tests are performed on the same day, only one set of test values needs to be  
727 recorded in the CRF. However, all abnormal values in repeated laboratory tests should be recorded  
728 in the CRF.

729 **3.7.5 Follow-up after Progression of Disease**

730 Patients will be contacted (by visit or telephone visit) every 12 weeks to acquire the  
731 information on overall survival and post-study chemotherapy. Follow-up should be performed every  
732 12 weeks until death of patient. The following information should be made available during each  
733 follow-up:

- 734 • Survival status of patient;
- 735 • If death has occurred, the date and cause of death should be recorded;
- 736 • All new anticancer treatments (including third-line and other anticancer treatments after  
737 progression) should be recorded.

738 **3.8 Data Quality**

739 To follow the guidelines of Good Clinical Practice (GCP), the monitor will visit each site on a  
740 regular basis to ensure compliance with the study protocol, GCP and relevant laws. The visit will  
741 involve on-site check of case report form (CRF) for completeness and legibility, cross-check against  
742 original documents, and clarification of management-related matters.

743 **3.9 Archiving**

744 The data entered into the case report form (CRF) must be consistent with the original  
745 documents, or directly recorded in the case report form. In case of direct recording in the CRF, the  
746 recorded contents will be used as the original data. The parameters of original data must be  
747 validated, and the information of data source must be recorded. Study documents and all original  
748 data should be preserved until a notice of destruction is received from the investigator.

749

750 **4 Investigational Drug**

751 **4.1 Icotinib**

752 **4.1.1 Name, Physicochemical Properties, Properties, Strength, Ingredients, Dosage and**  
753 **Administration, and Storage of Clinical Investigational Drug**

754 **Drug Name**

755 Trade Name: Conmana<sup>®</sup>

756 Generic Name: Icotinib Hydrochloride Tablets

757 Chemical Name: 4- [(3-ethynylphenyl) amino] - quinazoline [6,7-b] -12-crown-4-  
758 hydrochloride

759 Structural formula:

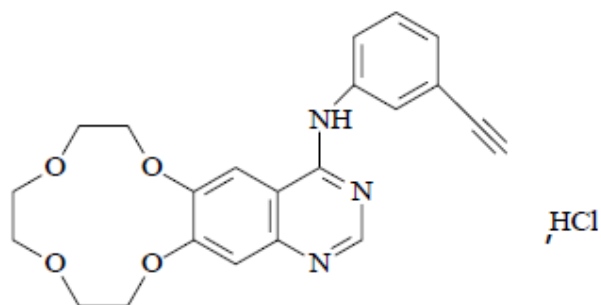

760

761 Molecular formula: C<sub>22</sub>H<sub>21</sub>N<sub>3</sub>O<sub>4</sub>·HCl

762 Molecular weight: 427.88

763 **Physicochemical Properties**

764 Physicochemical Properties: Icotinib hydrochloride is off-white to light yellow crystalline  
765 powder, odorless and non-hygroscopic. It is soluble in dimethyl sulfoxide, slightly soluble in  
766 acetonitrile-water (1: 1), methanol or chloroform, very slightly soluble in ethanol, and practically  
767 insoluble in water and acetonitrile. The melting point is 225~228°C. The absorption coefficient  
768 ( $E_{1cm}^{1\%}$ ) at a wavelength of 340 nm ranges from 500 to 520.

769 **Drug properties:** This product is brownish-red film-coated tablet, which is off-white after  
770 removal of its coating.

771 **Strength:** 125 mg.

772 **Ingredients:** The main ingredient of this product is icotinib hydrochloride.

773 **Dosage and Administration:** p.o. 1 tablet/time, tid.

774 **Storage:** Store in sealed containers, and protect from light.

775 **4.1.2 Package and Label**

776 The investigational drug will be packaged in an aluminum-plastic plate and placed in a pre-  
777 labeled medicine box for administration of subjects. Each medicine will be labeled with the  
778 protocol number, patient number, drug batch number, dosing instructions, and manufacturer's name,  
779 and indicated with: "FOR CLINICAL STUDIES, NOT FOR SALE".

780 **4.1.3 Drug Dispensing and Accountability**

781 The investigational drug will be dispensed by the investigator.



782        At appropriate intervals, or until the end of the study, all unused drugs, as well as empty boxes  
783 and strips, must be returned to Betta Pharmaceuticals Co., Ltd. At the end of the study, the monitor  
784 will verify all unused items.

785        **An inventory must be made available for inspection by the monitor.**

786 **5 Ethical and Legal Issues**

787 **5.1 Ethics Committee (EC) or Institutional Review Board (IRB)**

788 In accordance with GCP, Chinese laws and regulations as well as the requirements of relevant  
789 organizations, all sites involved in the study should obtain the approval documents from the  
790 associated Ethics Committee/Institutional Review Board prior to the start of the study. If necessary,  
791 the extension, amendment or re-audit of the approval letter from Ethics Committee must be  
792 obtained and handed over to the investigator.

793 **5.2 Ethical Guidance**

794 The procedures involved in the operation, evaluation and preparation of documents in this  
795 study protocol are established to ensure that the investigators follow the guidelines of Good Clinical  
796 Practice (GCP) and the guidelines specified in the *Declaration of Helsinki*. This study will also be  
797 conducted in accordance with the relevant laws and regulations of China.

798 The investigator cannot modify the study protocol without obtaining the consent. However, in  
799 case of emergency, in order to remove risk factors to subjects, the investigator may deviate from or  
800 change the study protocol without prior consent/support from the Ethics Committee/Institutional  
801 Review Board/Sponsor. Deviations or changes and their reasons should be submitted to the Ethics  
802 Committee/Institutional Review Board/Sponsor as soon as possible. If appropriate, a  
803 recommendation for protocol modifications should be submitted. All deviations or changes to the  
804 study protocol must be fully interpreted and described by the investigator.

805 **5.3 Subject Information and Informed Consent**

806 Subjects should be provided with the main information and ICFs of the study. Before the study,  
807 the investigator must provide the subject with the written approval/favorable opinion of the ICFs  
808 and all other written information from the Ethics Committee/Institutional Review Board. The  
809 approval letter/approved subject information/ICFs from the Ethics Committee/Institutional Review  
810 Board must be archived in the study file.

811 ICFs must be obtained prior to any specific study procedure. The date when subjects  
812 participate in the study and sign the ICFs should be recorded in the associated documents of  
813 subjects.

814 **5.4 Confidentiality**

815 All records concerning the patient's identity should be kept confidential and, to the extent  
816 permitted by the relevant laws and/or regulations, will not be disclosed to the public.

817 Names of subjects will not be provided. Only the subject numbers and initials will be recorded  
818 in the case report form. In case the name of a subject appears on any other document (e.g. pathology  
819 report), the copy of the document must be obliterated. Study reports stored in computer must  
820 comply with relevant local laws on data protection. The subject's identity will also be kept  
821 confidential when the results of the study are published.

822 The investigator will maintain a record for ease of identification of subjects.

823

## 824 **6 Statistical Methods and Determination of Sample Size**

### 825 **6.1 Statistical Analysis Plan**

#### 826 **6.1.1 Analysis Population**

827 Efficacy analysis will be performed in the intent-to-treat population (ITT), which is defined as  
828 all patients who receive at least one dose of study drug. The safety analysis population will include  
829 all patients who receive at least one dose of study drug. The response rate analysis population is  
830 defined as all patients in the ITT population with partial response or complete response as  
831 determined by RECIST criteria.

#### 832 **6.1.2 Baseline and Demographics**

833 Baseline, demographics, baseline tumor characteristics, medical history, prior anticancer  
834 therapy, concomitant medications, vital signs, and trial discontinuation will be summarized by  
835 treatment group for all grouped patients. For continuous measurement, the mean, standard  
836 deviation, distribution range and median will be calculated; and the absolute value, frequency and  
837 percentage will also be calculated.

#### 838 **6.1.3 Efficacy Analysis**

839 Efficacy analysis will be performed in the ITT population.

##### 840 6.1.3.1 Primary Efficacy Analysis

841 The primary endpoint is objective response rate (ORR).

##### 842 6.1.3.2 Secondary Efficacy Analysis

843 Progression-Free Survival (PFS)

844 Disease Control Rate (DCR)

845 Improvement of quality of life

846 Disease-related response

##### 847 6.1.3.3 Safety Analysis

848 Adverse events and the grade of the most severe reaction will be summarized according to the  
849 criteria of NCI CTCAE (Version 4), and adverse events will also be summarized according to their  
850 seriousness and relationship to the study drug. The descriptive summary of laboratory test values  
851 mainly focuses on outliers. Laboratory abnormalities will also be summarized by the worst grade  
852 according to the NCI CTCAE (Version 4).

## 853 **6.2 Determination of Sample Size**

854 The purpose of this study was to observe the ORR of icotinib in treatment-naive advanced  
855 NSCLC patients with EGFR sensitive mutation as detected by blood test. Approximately 120  
856 subjects are required to be enrolled.

857 According to previous literatures, it is estimated that the ORR of icotinib treatment in  
858 treatment-naive advanced NSCLC patients with EGFR sensitive mutation as detected by blood test  
859 is approximately 60%, with an allowable error of 10% and a significance level of 0.05%. It is  
860 estimated that at least 93 evaluable subjects are needed. Therefore, considering a dropout rate of not  
861 more than 20%, at least 117 subjects should be enrolled. Hence, it is finally proposed to enroll 120  
862 treatment-naive NSCLC patients with EGFR sensitive mutation as detected by blood test.

863

864

865  
866

## 867 7 Adverse Event

### 868 7.1 Precautions/Warnings

869 For the potential adverse reactions of Icotinib, please refer to the detailed prescription data in  
870 the package.

### 871 7.2 Monitoring of Adverse Event

872 Subjects must be closely monitored for adverse events, including clinical laboratory tests.  
873 Evaluation should be performed according to the seriousness and severity of adverse events and  
874 their relationship with the investigational drug.

875 The investigator is responsible for evaluation on the relationship between the study drug and  
876 all adverse events. However, the principal investigator may entrust other investigators participating  
877 in this study for judgment, but he/she is still responsible for this. The investigator must provide a  
878 list of qualified and delegated personnel.

### 879 7.3 Definition of Adverse Event

#### 880 7.3.1 Adverse Event

881 An adverse event refers to any untoward medical occurrence in a patient or subject  
882 administered a study drug. An adverse event does not necessarily have a causal relationship with the  
883 treatment. An adverse event can therefore be any unfavorable and unintended sign (including  
884 abnormal laboratory findings), symptom, or disease temporally associated with the use of study  
885 drug, whether or not considered drug-related.

886 Adverse events in humans (whether or not considered drug-related) include:

- 887 • Adverse events that occur during the use of drug by professionals;
- 888 • Adverse events caused by overdose (intentional or unintentional);
- 889 • Adverse events caused by drug abuse;
- 890 • Adverse events caused by drug withdrawal;
- 891 • Adverse events that occur just because of the patient's participation in the study (e.g.  
892 adverse events or serious adverse events due to discontinuation of antihypertensive drugs  
893 in the washout period) (such events must be reported as adverse events even if they are  
894 unrelated to the study drug).

895 Those which show no clinical pharmacological effects or fail to achieve the expected clinical  
896 pharmacological effects, and have been recorded in the associated part of the CRF are not  
897 considered as adverse events. However, if the criteria for "serious" adverse events are met, they  
898 should also be recorded and reported as serious adverse events. In this study, progression or  
899 worsening of an existing tumor must also be reported as a serious adverse event (SAE) if it meets  
900 the criteria for "serious" grade. The investigator should also report signs and symptoms due to  
901 progression or worsening of existing cancer.

#### 902 7.3.2 Serious Adverse Event

903 A serious adverse event refers to any untoward medical occurrence at any dose that meets any  
904 of the following conditions:

- 905 • Fatal;

- 906 • Life-threatening;
- 907 • Leading to hospitalization or prolonged hospital stay;
- 908 • Leading to persistent or significant incapacity or disability;
- 909 • Congenital anomaly or birth defect;
- 910 • Significant medical event.

911 **Life-threatening:** The term "life-threatening" is defined as "serious" and refers to an adverse  
912 event (AE) in which the subject is at risk of death. It does not refer to those AEs that may cause  
913 death when the hypothetical situation has worsened.

914 **Hospitalization:** Any AE that results in hospitalization of a patient or prolongation of hospital  
915 stay of an inpatient is considered serious, unless it meets one of the following characteristics:

- 916 – Stay in the hospital under observation for no more than 12 hours;

917 **Or**

- 918 – Hospital admission is preplanned (i.e., surgery or selective surgery scheduled prior to the  
919 start of this study);

920 **Or**

- 921 – Admission is not associated with an AE (e.g., hospitalization for convalescence purposes).

922 It should be noted that any invasive treatment performed during hospitalization may meet the  
923 criteria of "significant medical event" and therefore may need to be reported as a serious AE based  
924 on clinical judgment. Furthermore, if local authorities have stipulated more stringent definitions, the  
925 local regulations shall prevail.

926 **Disability:** It refers to a person who is severely impaired in his/her ability to perform daily  
927 activities.

928 **Significant medical event:** Any AE that may jeopardize the subject and may require  
929 intervention to prevent a more serious condition is considered serious. Significant medical events  
930 are identified according to the "World Health Organization Adverse Reaction Terminology  
931 (WHOART) - Key Terms". These terms refer to, or describe, severe disease states.

932 Such events are reported as serious AEs because they may be associated with a serious disease  
933 state and because reporting as an SAE warrants special attention compared with other modes of  
934 reporting.

### 935 **7.3.3 Unexpected Adverse Event**

936 An unexpected AE is an adverse drug reaction, the characteristics or severity of which are not  
937 consistent with those described in this Investigator's Brochure (or in the package insert for the  
938 marketed product). Supplementation of important information on the characteristics or severity of  
939 known and documented AEs is also part of the reporting of unexpected AEs. For example, events  
940 that are more specific or more serious than those described in the Investigator's Brochure should be  
941 considered "unexpected". Specific examples include: (a) acute renal failure that has been designated  
942 an AE, followed by interstitial nephritis; and (b) hepatitis first reported as acute hepatic necrosis.

### 943 **7.3.4 Relationship between Adverse Event and Investigational Drug**

944 The evaluation of the relationship between an AE and the study drug is a comprehensive  
945 clinical judgment based on all the information obtained when completing the Case Report Form  
946 (CRF).

947 Evaluation of "unrelated" conditions may include:

- 948 1. Clear alternative explanation, such as traumatic bleeding at the operation site;  
949 **Or**  
950 2. Unreasonable, e.g., a subject was hit by a car, but there was no indication that the drug-  
951 induced disorientation led to the event; or cancer developed only a few days after starting  
952 the dosing.

953 An assessment of "Yes" indicates there is a reasonable possibility that the AE may be related to  
954 the study drug.

955 Factors to be considered when assessing the relationship of an AE to study drug include:

- 956 – Occurs shortly after drug intake: the AE should occur after drug administration. The  
957 clinical evaluation of an event should consider the time from drug administration to the  
958 occurrence of the event.
- 959 – The event disappears after drug withdrawal (stimulation cessation) and reoccurs after drug  
960 re-administration (repeated stimulation): The clinical course of the suspected event should  
961 be analyzed with full consideration of the subject's response after discontinuation  
962 (stimulation cessation) or the subject's response after re-administration (repeated  
963 stimulation).
- 964 – Underlying, concomitant and intermittent diseases: it is necessary to make an evaluation on  
965 the natural course of relevant diseases, treatment process and all other diseases the patients  
966 may suffer from in each report;
- 967 – Concomitant medication or treatment: Other medications administered to the subject or  
968 other treatments administered to the subject should be examined to determine if one of  
969 these may have caused the AE;
- 970 – Known pattern of response to a class of drugs: clinical/preclinical
- 971 – Pharmacology and pharmacokinetics of the investigational drug: The pharmacokinetic  
972 characteristics (absorption, distribution, metabolism and excretion) of the investigational  
973 drug should be considered in combination with the individual pharmacodynamic response  
974 of each subject.

### 975 **7.3.5 Recording of Adverse Event**

976 All AEs occurring after the subject signs the Informed Consent Form (ICF) must be completely  
977 recorded in the subject's CRF.

978 Records must be supported by original data. Laboratory abnormalities that are considered  
979 clinically relevant (e.g., those that result in early withdrawal of a subject from the study, require  
980 treatment to a subject, or trigger an apparent clinical manifestation, or are considered clinically  
981 relevant by the investigator) should be reported as AEs. Each event should be described in detail,  
982 including the start and stop date, severity, relationship with the investigational product, actions  
983 taken, and outcome of the event.

## 984 **7.4 Reporting of Serious Adverse Event**

985 Serious adverse events (SAEs) meeting the definition, including laboratory abnormalities  
986 meeting the definition of an SAE, that occur from the signing of the ICF through 30 days after the  
987 completion of the last dose must be reported immediately (within 24 hours of the investigator's  
988 awareness) to the designated person in the study document. The SAE Report Form must also be  
989 completed and submitted to the designated person in the study document within 24 hours of the  
990 investigator's awareness.

991 Each SAE should be followed up until it is resolved or stabilized, and an updated report should

992 be submitted to the designated person. Pure grade 4 laboratory abnormalities (according to CTCAE  
993 v3.0 criteria) are not to be reported as serious adverse reactions unless the investigator believes that  
994 the abnormality has met the International Conference on Harmonisation (ICH) criteria for SAEs  
995 (see Section 6.3.2 for definition). CTCAE v3.0 grade 4 laboratory abnormalities that occur at  
996 baseline and are manifestations of the disease should not be reported as SAEs, especially if they are  
997 still allowed by the Protocol or not excluded from the study. If there is a question as to whether an  
998 abnormality should be reported as an SAE, the investigator may consult with the study monitor.  
999 CTCAE grade 4 laboratory abnormalities should be recorded on the "laboratory data" page and  
1000 checked periodically by the medical monitor.

1001       According to the requirements of local laws and regulations, SAEs must be reported to the  
1002 Ethics Committee and NMPA.

1003

1004 **8 Data Management**

1005 **8.1 Completion and Transfer of Case Report Form**

1006 The CRF of each included case will be completed by the investigator. After the completed  
1007 CRFs are reviewed by the study monitor, they will be transferred to the data manager for data entry  
1008 and management.

1009 **8.2 Data Entry and Modification**

1010 Data entry and administration are the responsibility of the Data Administrator designated by  
1011 the Biostatistician. The data entry and management will be performed by the data manager using  
1012 data entry program prepared by the EpiData software. Data are entered in duplicate to ensure the  
1013 accuracy of data.

1014 For the questions in the CRF, the Data Administrator generates a data response question  
1015 (DRQ) and send it to the investigator through the clinical monitor. The investigator should reply and  
1016 return as soon as possible. The Data Administrator modifies, confirms and enters the data according  
1017 to the investigator's replies, and DRQ may be sent again if necessary.

1018 **8.3 Data Locking**

1019 After confirming that the established database is correct, the data are locked by the Principal  
1020 Investigator (PI), the Sponsor, and the statistical analyst. The locked data documents will be not  
1021 modified.

1022 **8.4 Data Processing**

1023 After all the trial data are entered and locked, the database will be submitted to the statistician  
1024 for statistical analysis according to the requirements of the statistical plan. After completing the  
1025 statistical analysis, the statistical analyst will write the statistical analysis report, which will be  
1026 submitted to the PI of this trial to prepare the trial summary report. An independent third party will  
1027 assume the biostatistics work, participate in the trial design and protocol implementation, be  
1028 responsible for data administration and statistical analysis, and complete the statistical summary  
1029 report.

1030



1031

1032 **9 Informed Consent**

1033 The PI ensures that the subjects are provided with complete and adequate verbal and written  
1034 information about the nature, purpose, possible risks and benefits of the study. Subjects must also be  
1035 informed that they are free to withdraw from the study at any time. Subjects should have the  
1036 opportunity to ask questions and have time to consider the information given.

1037 ICFs signed and dated by subjects must be obtained prior to performing any study-specific  
1038 procedures.

1039 The Principal Investigator must keep the original copies of the signed ICFs.

1040

1041 **10 Appendix**

1042 **10.1 Performance Status (ECOG Score)**

| Grade | Description                                                                                                                                                                         |
|-------|-------------------------------------------------------------------------------------------------------------------------------------------------------------------------------------|
| 0     | Fully active, able to carry on all pre-disease performance without restriction. (Karnofsky 90-100 points)                                                                           |
| 1     | Restricted in physically strenuous activity but ambulatory and able to carry out work of a light or sedentary nature, e.g., light house work, office work. (Karnofsky 70-80 points) |
| 2     | Ambulatory and capable of all self-care but unable to carry out any work activities. Up and about more than 50% of waking hours. (Karnofsky 50-60 points)                           |
| 3     | Capable of only limited self-care. Confined to bed or chair more than 50% of waking hours. (Karnofsky 30-40 points)                                                                 |
| 4     | Completely disabled. Cannot carry on any self-care. Totally confined to bed or chair. (Karnofsky 10-20 points)                                                                      |

1043 **10.2 TNM Staging System - UICC Criteria**

1044 **Seventh edition for TNM staging**

1045 **T staging of primary tumors**

1046 **TX**. Primary tumour cannot be assessed, or tumour proven by the presence of  
 1047 malignant cells in sputum or bronchial washings but not visualized by imaging or  
 1048 bronchoscopy.

1049 **T0** No evidence of primary tumor.

1050 **Tis** Carcinoma *in situ*.

1051 **T1** Tumour < 3 cm in greatest dimension, surrounded by lung or visceral pleura,  
 1052 without bronchoscopic evidence of invasion more proximal than the lobar  
 1053 bronchus. (Some rare superficial tumors confined to the bronchial wall are  
 1054 classified as T1 regardless of size, even if they involve above the main bronchus).

1055 **T1a** Tumour ≤ 2 cm in greatest dimension.

1056 **T1b** Tumour > 2 cm but ≤ 3 cm in greatest dimension.

1057 **T2** Tumour > 3 cm but ≤ 7 cm or tumour with any of the following features:

1058 Involves main bronchus, > 2 cm distal to the carina

1059 Invades visceral pleura

1060 Associated with atelectasis or obstructive pneumonitis that extends to the hilar  
 1061 region but does not involve the entire lung

1062 **T2a** Tumour > 3 cm but ≤ 5 cm in greatest dimension.

1063 **T2b** Tumour > 5 cm but ≤ 7 cm in greatest dimension.

1064 **T3** Tumour > 7 cm or one that directly invades any of the following:

1065 Chest wall (including superior sulcus tumours), diaphragm, phrenic nerve,  
 1066 mediastinal pleura, parietal pericardium

1067 Tumour in the main bronchus < 2 cm distal to the carina but without involvement  
 1068 of the carina

1069 Associated atelectasis or obstructive pneumonitis of the entire lung

1070 Separate tumour nodule(s) in the same lobe  
 1071 **T4** Tumour of any size that invades any of the following:  
 1072 Mediastinum, heart, great vessels, trachea, recurrent laryngeal nerve, esophagus,  
 1073 vertebral body, carina

1074 Separate tumour nodule(s) in a different ipsilateral lobe.

1075 **N staging of regional lymph nodes**

1076 **NX** Regional lymph nodes cannot be assessed.  
 1077 **N0** No regional lymph node metastasis.  
 1078 **N1** Metastasis in ipsilateral peribronchial and/or ipsilateral hilar lymph nodes and  
 1079 intrapulmonary nodes, including involvement by direct extension.  
 1080 **N2** Metastasis in ipsilateral mediastinal and/or subcarinal lymph node(s).  
 1081 **N3** Metastasis in contralateral mediastinal, contralateral hilar, ipsilateral or  
 1082 contralateral scalene, or supraclavicular lymph node(s).

1083 **M staging of distant metastasis**

1084 **Mx** Distant metastasis cannot be assessed.  
 1085 **M0** No distant metastasis.  
 1086 **M1** Distant metastasis.  
 1087 **M1a** Separate tumour nodule(s) in a contralateral lobe  
 1088 tumour with pleural nodules or malignant pleural/ pericardial effusion.  
 1089 **M1b** Distant metastasis.

1090 **Clinical staging (AJCC 2009)**

1091 **Concealed stage** TXN0M0  
 1092 **Stage 0** TisN0M0  
 1093 **Stage IA** T1N0M0  
 1094 **Stage IB** T2aN0M0  
 1095 **Stage IIA** T1N1M0, T2aN1M0, T2bN0M0  
 1096 **Stage IIB** T2bN1M0, T3N0M0  
 1097 **Stage IIIA** T4N0M0, T3-4N1M0, T1-3N2M0  
 1098 **Stage IIIB** T4N2M0, T1-4N3M0  
 1099 **Stage IV** T1-4N0-3M1

1100 (The above stages are summarized in the following table)

| T/M | N0  | N1   | N2   | N3   |
|-----|-----|------|------|------|
| T1a | IA  | IIA  | IIIA | IIIB |
| T1b | IA  | IIA  | IIIA | IIIB |
| T2a | IB  | IIA  | IIIA | IIIB |
| T2b | IIA | IIB  | IIIA | IIIB |
| T3  | IIB | IIIA | IIIA | IIIB |
|     | IIB | IIIA | IIIA | IIIB |

| T/M | N0   | N1   | N2   | N3   |
|-----|------|------|------|------|
|     | IIB  | IIIA | IIIA | IIIB |
| T4  | IIIA | IIIA | IIIB | IIIB |
|     | IIIA | IIIA | IIIB | IIIB |
| M1a | IV   | IV   | IV   | IV   |
|     | IV   | IV   | IV   | IV   |
| M1b | IV   | IV   | IV   | IV   |

1101 **10.3 Response Evaluation Criteria in Solid Tumors RECIST 1.1**

1102 Tumor response and progression will be evaluated in this study using the new international  
 1103 standard (14) proposed by the Response Evaluation Criteria in Solid Tumors (RECIST) Committee.  
 1104 RECIST varies only in that the largest diameter (one-dimensional measurement) of the tumor lesion  
 1105 is applied.

1106 **Measurable lesions:** Measurable lesions are defined as those that can be accurately measured in at  
 1107 least one dimension (recording the longest diameter) with a maximum diameter of  $\geq 20$  mm using  
 1108 conventional techniques (PE, CT, XR, MRI) or  $\geq 10$  mm using spiral CT scan. Spiral CT done to  
 1109 assess tumor response must be reconstructed with a layer thickness of 5 mm. All tumor  
 1110 measurements must be recorded in millimeters (or one-tenth of a centimeter).

1111 **Non-measurable lesions:** All other lesions (or sites of disease), including small lesions (longest  
 1112 diameter  $< 20$  mm using conventional techniques or  $< 10$  mm using spiral CT scans), are considered  
 1113 non-measurable. Bone lesions, meningeal lesions, ascites, pleural/pericardial effusion, lymphangitis  
 1114 of the skin/pneumonia, inflammatory breast disease, abdominal lesions (cannot be followed up by  
 1115 CT or MRI), and bladder lesions are all considered non-measurable.

1116 **Target lesions:** A maximum of 2 of all measurable lesions per organ can be selected as target  
 1117 lesions and a maximum of 5 representative lesions of all involved organs can be selected as target  
 1118 lesions. All target lesions should be recorded and measured at baseline. These 5 lesions should be  
 1119 selected on the basis of their size (longest diameter of the lesion) and the repeatability of their  
 1120 accurate measurements (regardless of imaging techniques measurement or clinical measurement).  
 1121 The sum of the longest diameter (LD) of all target lesions is considered as the baseline sum LD. The  
 1122 baseline sum LD will be used as the reference value to objectively evaluate the tumor response by  
 1123 measuring the size of subsequent lesions. If more than 5 measurable lesions are present, those not  
 1124 selected as target lesions will be identified as non-target lesions along with the non-measurable  
 1125 lesions (see Section 9.3).

1126 **Non-target lesions:** Include all non-measurable lesions (or sites of disease) and all measurable  
 1127 lesions except for the 5 target lesions selected. These lesions do not need to be measured but should  
 1128 be recorded as "present" or "absent" at baseline and at each follow-up visit.

1129 **Response assessments:** All patients will have one of the following response assessments:

1130 **Complete response (CR):** Disappearance of all clinical and radiographic evidence of tumor,  
 1131 including target and non-target lesions.

1132 **Partial response (PR):** At least a 30% decrease in the sum of the LD of target lesions, reference  
 1133 the baseline sum LD.

1134 **Stable disease (SD):** Stable state of the disease. Neither sufficient shrinkage to qualify for PR nor  
 1135 sufficient increase to qualify for PD.

1136 **Progressive disease (PD):** At least a 20% increase in the sum LD of the measured lesions or the  
 1137 appearance of one or more new lesions, taking as reference the smallest total LD recorded since the  
 1138 treatment started. The appearance of any new lesion signifies disease progression. In exceptional

1139 cases, unequivocal progression of the non-measurable lesion is also accepted as evidence of disease  
1140 progression.

1141 **Response Assessment of Target and Non-Target Lesions**

| Target lesions | Non-target lesions | New lesions | Overall Response | Additional Requirements for Optimal Response    |
|----------------|--------------------|-------------|------------------|-------------------------------------------------|
| CR             | CR                 | None        | CR               | Confirmed after > 4 weeks                       |
| CR             | Non-CR/Non-PD      | None        | PR               | Confirmed after > 4 weeks                       |
| PR             | Non-PD             | None        | PR               |                                                 |
| SD             | Non-PD             | None        | SD               | Maintained for at least > 4 weeks from baseline |
| PD             | Any                | Yes or No   | PD               | No prior SD, PR, or CR                          |
| Any            | PD                 | Yes or No   | PD               |                                                 |
| Any            | Any                | Yes         | PD               |                                                 |

1142 \* Patients who experience an overall deterioration in their health status and require  
1143 discontinuation of treatment should be reported as "symptomatic deterioration" if there is no  
1144 objective evidence of disease progression at that time. Every effort should be made to observe  
1145 and document objective disease progression even after discontinuation of treatment.

1146 **10.4 NCI Common Terminology Criteria for Adverse Events (CTCAE),**  
1147 **Version 4.03**

1148 The NCI CTCAE version 4.0 will be used in this study to report toxicities and serious adverse  
1149 events. The CTC4.03 can be downloaded from the CTEP homepage  
1150 (<http://ctep.info.nih.gov/CTC3/ctc.htm>).

1151 **10.5 Effective Management of EGFR TKI-associated Cutaneous Adverse**  
1152 **Reactions**

1153 In clinical practice, reasonable preventive measures and patient education are the most critical  
1154 steps (see Section VI).

1155 When a skin lesion occurs, the lesion severity is first determined and then the lesion is treated  
1156 step by step according to the severity:

1157 ◆ **Mild toxicity:** Patients may not require any form of intervention, and compound  
1158 dexamethasone acetate, hydrocortisone (1% or 2.5% ointment), or clindamycin (10% gel)  
1159 may also be applied topically. The dose of EGFR-TKI should not be altered due to mild  
1160 toxicity. The severity of the rash is reassessed after 2 weeks and the condition is treated for  
1161 moderate toxicity if it has worsened or does not improve significantly.

1162 ◆ **Moderate toxicity:** Topical use of 2.5% hydrocortisone ointment or erythromycin  
1163 ointment, and oral clarityne; oral minocycline (doxycycline) should be given as early as  
1164 possible to patients with subjective symptoms. The rash should be evaluated after 2 weeks;  
1165 if the condition deteriorates or there is no significant improvement, the patient should enter  
1166 the next level of treatment.

1167 ◆ **Severe rash:** The intervention measures are basically the same as moderate rash. If  
1168 necessary, a pulse dose of methylprednisolone can be given, and the dose of EGFR-TKI  
1169 can be reduced; if the adverse reaction is not adequately relieved after 2 ~ 4 weeks, drug  
1170 interruption or treatment discontinuation should be considered.

1171 **10.6 Testing of Tumor Specimens**

1172 Blood samples for EGFR gene detection at screening: Specimens collected during screening  
1173 are processed and shipped to a central laboratory for testing for mutations in the EGFR gene.

1174 Blood samples for exploratory biomarker analysis and sampling time points. Blood samples  
1175 will be periodically transported to the central laboratory for testing after sampling and  
1176 centralization. See "SOP for Blood Sampling" below for details.

1177 In order to ensure accurate and reliable testing of blood samples, EDTA should be used as the  
1178 anticoagulant during the blood sampling. The specific operating procedures are as follows:

1179 1. Prepare three 10 ml STRECK DNA BCT disposable vacuum cell-free blood collection  
1180 tubes or three 8 ml EDTA anticoagulant vacuum blood collection tubes and twelve to eighteen 2 ml  
1181 enzyme-free EP tubes before drawing blood. Stick a label on each tube, indicating the trial name,  
1182 subject screening ID, subject initials, site name, visit period, and date of blood draw.

1183 2. At screening, collect whole blood samples using a 10 ml STRECK DNA BCT disposable  
1184 vacuum cell-free blood collection tube, 8 ml per tube and 3 tubes in total, and complete the  
1185 corresponding specimen collection record. Transfer these tubes to each central laboratory for  
1186 plasma separation within 14 days and for further processing and testing according to the standard  
1187 operating procedures of SARMS, ddPCR, and NGS tests;

1188 3. At each visit during treatment and at the end of treatment, the following two options are  
1189 acceptable depending on the availability of 4°C centrifuges and -80°C refrigerators at each site:

1190 (1) If 4°C centrifuge and -80°C refrigerator are not available, collect whole blood samples  
1191 using a 10 ml STRECK DNA BCT disposable vacuum cell-free blood collection tube, 8 ml per tube  
1192 and 3 tubes in total, and complete the corresponding specimen collection record. Transfer these  
1193 tubes to each central laboratory for plasma separation within 14 days;

1194 (2) If 4°C centrifuge and -80°C refrigerator are available, collect whole blood samples using  
1195 an 8 ml EDTA anticoagulant blood collection tube, 8 ml per tube and 3 tubes in total, and separate  
1196 the whole blood within 2 hours:  centrifuge the tubes containing whole blood at 3500 rpm for 10-  
1197 15 min using a 4°C centrifuge;  aspirate the upper plasma with a pipette and dispense it into 2 ml  
1198 EP tubes, about 2 ml of plasma/tube;  transfer the lower tangible cell precipitate (*i.e.* the white  
1199 blood cell layer between yellow plasma and red blood) after centrifugation into 2 ml EP tubes and  
1200 complete the label on each EP tube;  store the above EP tubes containing plasma and tangible cell  
1201 precipitate and the lower red blood cells after centrifugation in a -80°C refrigerator and complete  
1202 the label and the specimen storage record; and  transport the stored blood samples to each central  
1203 laboratory via a designated transportation company at a low temperature within the specified time  
1204 and store them in a -80°C refrigerator.

1205 (3) Further process and test the samples according to the standard NGS testing procedures.

1206 **10.7 New York Heart Association Functional Classification**

| <b>New York Heart Association (NYHA) Functional Classification</b> |                                                                                                                                                                                                                              |
|--------------------------------------------------------------------|------------------------------------------------------------------------------------------------------------------------------------------------------------------------------------------------------------------------------|
| <b>Class I</b>                                                     | Patients with cardiac disease but without resulting limitation of physical activity. Ordinary physical activity does not cause undue fatigue, palpitation, dyspnea, or anginal pain.                                         |
| <b>Class II</b>                                                    | Patients with cardiac disease resulting in slight limitation of physical activity. They are comfortable at rest. Ordinary physical activity results in fatigue, palpitation, dyspnoea or anginal pain.                       |
| <b>Class III</b>                                                   | Patients with cardiac disease resulting in marked limitation of physical activity. They are comfortable at rest. Less than ordinary physical activity causes fatigue, palpitation, dyspnoea or anginal pain                  |
| <b>Class IV</b>                                                    | Patient with cardiac disease resulting in inability to carry on any physical activity. Symptoms of heart failure or anginal syndrom may be present at rest. If any physical activity is undertaken, discomfort is increased. |

1207 **10.8 Calculation of Creatinine Clearance**

1208 **Cockcroft-Gault calculation formula for female patients:**

1209 Creatinine clearance [ml/min] =

1210 
$$((140 - \text{age}) \times \text{actual body weight [kg]} \times 0.85) / (72 \times \text{serum creatinine [mg/dl]})$$

1211 Or

1212 
$$((140 - \text{age}) \times \text{actual body weight [kg]} \times 0.85) / (0.81 \times \text{serum creatinine [\mu\text{mol/L}]})$$

1213 **Cockcroft-Gault calculation formula for male patients:**

1214 Creatinine clearance [ml/min] =

1215 
$$((140 - \text{age}) \times \text{actual body weight [kg]}) / (72 \times \text{serum creatinine [mg/dl]})$$

1216 Or

1217 
$$((140 - \text{age}) \times \text{actual body weight [kg]}) / (0.81 \times \text{serum creatinine [\mu\text{mol/L}]})$$

1218

1219  
1220

## 1221 11 References

- 1222 1. Ferlay J, Soerjomataram I, Dikshit R, et al. Cancer incidence and mortality worldwide:  
1223 sources, methods and major patterns in GLOBOCAN 2012[J]. International journal of  
1224 cancer, 2015, 136(5): E359-E386.
- 1225 2. Chen W, Zheng R, Zhang S, et al. Cancer incidence and mortality in China in 2013: an  
1226 analysis based on urbanization level[J]. Chinese Journal of Cancer Research, 2017, 29(1):  
1227 1.
- 1228 3. Mitsudomi T, Morita S, Yatabe Y, et al. Gefitinib versus cisplatin plus docetaxel in patients  
1229 with non-small-cell lung cancer harbouring mutations of the epidermal growth factor  
1230 receptor (WJTOG3405): an open label, randomised phase 3 trial[J]. The lancet oncology,  
1231 2010, 11(2): 121-128.
- 1232 4. Rosell R, Carcereny E, Gervais R, et al. Erlotinib versus standard chemotherapy as first-  
1233 line treatment for European patients with advanced EGFR mutation-positive non-small-cell  
1234 lung cancer (EURTAC): a multicentre, open-label, randomised phase 3 trial[J]. The lancet  
1235 oncology, 2012, 13(3): 239-246.
- 1236 5. Ono M, Kuwano M. Molecular mechanisms of epidermal growth factor receptor (EGFR)  
1237 activation and response to gefitinib and other EGFR-targeting drugs. Clin Cancer Res.  
1238 2006. 12(24): 7242-51.
- 1239 6. Mok TS, Wu YL, Thongprasert S, et al. Gefitinib or carboplatin-paclitaxel in pulmonary  
1240 adenocarcinoma. N Engl J Med. 2009. 361(10): 947-57.
- 1241 7. Zhou C, Wu YL, Chen G, et al. Erlotinib versus chemotherapy as first-line treatment for  
1242 patients with advanced EGFR mutation-positive non-small-cell lung cancer (OPTIMAL,  
1243 CTONG-0802): a multicentre, open-label, randomised, phase 3 study. Lancet Oncol. 2011.  
1244 12(8): 735-42.
- 1245 8. zhou C, Wu YL, Liu X, et al. Overall survival(os)/results from 017r1MAL(CTONc0802),  
1246 a phase III trial of erlotinib(E) versus carboplatin plus gemcitabine(GC) as first—line  
1247 treatment for Chinese patients with EGFR mutation-positive advanced non small cell lung  
1248 cancer(NSCLC)[J]. J Clin Oncol, 2012, 30 Suppl: Abstract 7520.
- 1249 9. Zhao Q, Shentu J, Xu N, et al. Phase I study of icotinib hydrochloride (BPI-2009H), an  
1250 oral EGFR tyrosine kinase inhibitor, in patients with advanced NSCLC and other solid  
1251 tumors. Lung Cancer. 2011. 73(2): 195-202.
- 1252 10. Shi Y, Zhang L, Liu X, et al. Icotinib versus gefitinib in previously treated advanced non-  
1253 small-cell lung cancer (ICOGEN): a randomised, double-blind phase 3 non-inferiority trial.  
1254 *Lancet Oncol*2013; 14: 953-61.
- 1255 11. Dong Q, Liu YP, Qu XJ, et al. Expressions of c-Cbl, Cbl-b, and epidermal growth factor  
1256 receptor in gastric carcinoma and their clinical significance [J]. Chinese Journal of Cancer.  
1257 2010, 29 (1): 59-64.
- 1258 12. Cui YL. The involvement of EGFR nuclear translocation in cisplatin resistance in human  
1259 esophageal carcinoma [M]. Xinxiang Medical University, 2014,4.
- 1260 13. Sun XX. Analysis of gene expression in cancer genome [M]. Jilin University, 2013,4.



- 1261 14. Feng SY. Study on the expression and correlation of PTEN, Ki-67 and EGFR in  
1262 thymoma[M]. Jilin University, 2013,3.
- 1263 15. Jiang B, Li J, Gong P. EGFR gene mutation detection with circulating DNA and the  
1264 targeting therapy response in advanced NSCLC patients[J]. Chinese Journal of Cancer  
1265 Prevention and Treatment, 2014,21 (1) :29-33.
- 1266 16. (Kimura, 2007; Bai, 2009; Yung, 2009; Mok, 2013)
- 1267 17. (Huang, 2012; Mok, 2013; Bai, 2009)
- 1268 18. Li J, Li BT. Circulating tumor DNA and its application in liquid biopsy of cancer [J]. E-J  
1269 Transl Med, 2017,4 (3) :1-6.
- 1270 19. Tang YL. Advances in liquid biopsy and detection of lung cancer [J]. Int J Lab Med,  
1271 2016,37 (17) :2429-2431.
- 1272 20. Wu YL. Liquid Biopsy: Specification with Precision[J]. The Journal of Evidence-Based  
1273 Medicine, 2016,16 (4) :193-197.
- 1274 21. Wang HY, Ge R, Liu BR. Advances in research of intratumor heterogeneity and real-time  
1275 liquid biopsy [J]. MODERN ONCOLOGY, 2015,23 (7) :1008-1011.
- 1276 22. Zhong WZ, Lei YY, Wu YL. Liquid Biopsy: Blue-Green Algae or Blue Ocean  
1277 Strategy?[J]. The Journal of Evidence-Based Medicine, 2016,16 (1) :1-4.
- 1278 23. Ling C, Jiang T. Liquid biopsy for monitoring EGFR-TKI drug resistance in patients with  
1279 non-small-cell lung cancer [J]. Laboratory Medicine, 2016,31 (10) :835-843
- 1280 24. Xu T, Xu GB, Jia SQ, et al. Review on the application of circulating tumor DNA detection  
1281 in the diagnosis and treatment of malignant tumors [J]. hin J Clin Lab Sci, 2017,35  
1282 (2) :81-88.
- 1283 25. Yu Q, Guo W. Digital PCR analysis of plasma cell-free DNA for non-invasive detective of  
1284 TKI targeted EGFR mutation in NSCLC patients [J]. Clin J Lab Med, 2016,39 (3) :154-  
1285 157.
- 1286

1287

1288

1289 **12 Protocol Signature Page**

1290

**Statement of Investigator**

1291

1292

1293

I have read this protocol and conduct this clinical study in accordance with the moral, ethical, and scientific principles stipulated in the Declaration of Helsinki and Chinese GCP. I agree to conduct this clinical study in accordance with the design and provisions of this protocol.

1294

1295

1296

I will be responsible for making medical decisions related to the clinical trial to ensure that subjects are treated promptly in the event of AEs during the trial. I understand the procedures and requirements for correct reporting of SAEs, and I will record and report these events as required.

1297

1298

1299

1300

I guarantee that the data will be accurately, completely, timely and rightfully recorded in the CRF. I will cooperate with the monitoring and audit activities by the study monitor or auditor designated by the Sponsor, as well as the audit and inspection activities by the drug regulatory authority to ensure the quality of clinical study.

1301

1302

I will provide a *Curriculum Vitae* before the clinical study, which will be submitted to the Ethics Committee and possibly to the drug regulatory authority.

1303

1304

1305

1306

Investigator (Signature): \_\_\_\_\_ Date: \_\_\_\_\_
