# Supplementary material
Source: PubMed Central journal article supplement (PMC9305594)
Supplement: jamaoncol-e222719-s002.pdf [file jamaoncol-e222719-s002.pdf]

## Supplemental Online Content

Xu J, Liu Z, Bai H, et al. Evaluation of clinical outcomes of icotinib in patients with clinically diagnosed advanced lung cancer with *EGFR*-sensitizing variants assessed by circulating tumor DNA testing: a phase 2 nonrandomized clinical trial. *JAMA Oncol*. Published online July 21, 2022. doi:10.1001/jamaoncol.2022.2719

### **eMethods.**

**eTable 1.** The Clinical Outcomes Evaluated by Independent Review Committee (N = 116)

**eTable 2.** The Treatment-Related Adverse Events of 116 Patients

**eTable 3.** The Clinical Outcomes of Patients With *EGFR* Variants Detected Using 3 Independent Platforms

**eFigure.** Venn Diagram Exhibiting the Distribution and Clinical Outcomes of Patients With *EGFR* Variants Detected Using 3 Independent Platforms

### **eReferences.**

This supplementary material has been provided by the authors to give readers additional information about their work.

## **eMethods.**

### **The justification of sample size**

According to previous literatures, it is estimated that the objective response rate (ORR) of icotinib treatment in treatment-naive advanced non-small-cell lung cancer (NSCLC) patients with *epidermal growth factor receptor (EGFR)* sensitive mutation as detected by blood test is approximately 60%, with an allowable error of 10% and a significance level of 0.05%. It is estimated that at least 93 evaluable subjects are needed. Therefore, considering a dropout rate of not more than 20%, at least 117 subjects should be enrolled.

### **The statistical methods**

ORR and disease control rate (DCR) were defined according to Response Evaluation Criteria In Solid Tumors (RECIST) 1.1 as evaluated by independent review committee, and the 95% Confidence Intervals (CI) for ORR and DCR were estimated by Clopper-pearson method. The median progression-free survival (mPFS), median overall survival (mOS), the median duration of response (mDOR) and the corresponding 95% CIs were analyzed using Kaplan-Meier estimation. The follow-up duration was calculated by reverse Kaplan-Meier estimation. The analyses were conducted from September 9th 2021 to December 31th 2021 using SAS 9.4 (SAS Institute Inc., Cary, NC) software.

### **The concordance of SuperARMS, ddPCR and NGS**

The concordance of the three platforms is the sum of positive concordance and negative concordance among three platforms (SuperARMS<sup>1</sup>, ddPCR<sup>2</sup> and NGS<sup>3</sup>). The positive concordance refers to the percentage of cases detected with positive *EGFR* 19Del, L858R, and

T790M by all three platforms among all cases detected, while the negative concordance refers to the percentage of cases detected with negative *EGFR* 19Del, L858R, and T790M by all three platforms among all cases detected.

**eTable 1.** The Clinical Outcomes Evaluated by Independent Review Committee (N = 116)

| Items               |                       |
|---------------------|-----------------------|
| Best response       |                       |
| CR (n, %)           | 1 (0.9%)              |
| PR (n, %)           | 60 (51.7%)            |
| SD (n, %)           | 37 (31.9%)            |
| PD (n, %)           | 16 (13.8%)            |
| NE (n, %)           | 2 (1.7%)              |
| ORR (95% CI)        | 52.6% (43.1%, 61.9%)  |
| DCR (95% CI)        | 84.5 % (76.6%, 90.5%) |
| Median PFS (95% CI) | 10.3 (8.3, 12.2)      |
| PFS rate (95% CI)   |                       |
| 1-year              | 42.2% (33.2%, 51.0%)  |
| 2-year              | 22.4% (15.3%, 30.3%)  |
| 3-year              | 12.2% (6.6%, 19.7%)   |
| Median OS (95% CI)  | 23.2 (17.7, 28.0)     |
| OS rate (95% CI)    |                       |
| 1-year              | 75.7% (66.8%, 82.5%)  |
| 2-year              | 48.4% (39.0%, 57.2%)  |
| 3-year              | 30.6% (21.9%, 39.7%)  |
| Median DOR (95% CI) | 9.1 (7.3, 11.7)       |

**Abbreviation:** CR, complete response; PR, partial response; SD, stable disease; PD, progressed disease; NE, not evaluable; ORR, objective response rate; DCR, disease control rate; PFS, progression-free survival; OS, overall survival; DOR, duration of response; CI, confidence interval.

**eTable 2.** The Treatment-Related Adverse Events of 116 Patients

| TRAЕ                                 | N (%)     |          |         |         |         | Total     |
|--------------------------------------|-----------|----------|---------|---------|---------|-----------|
|                                      | Grade 1   | Grade 2  | Grade 3 | Grade 4 | NA      |           |
| Rash                                 | 53 (45.7) | 6 (5.2)  | 0 (0.0) | 1 (0.9) | 0 (0.0) | 60 (51.7) |
| Fatigue                              | 48 (41.4) | 7 (6.0)  | 3 (2.6) | 0 (0.0) | 0 (0.0) | 58 (50.0) |
| Diarrhea                             | 33 (28.4) | 4 (3.4)  | 0 (0.0) | 0 (0.0) | 0 (0.0) | 37 (31.9) |
| Pruritus                             | 32 (27.6) | 6 (5.2)  | 2 (1.7) | 0 (0.0) | 0 (0.0) | 40 (34.5) |
| Dry skin                             | 30 (25.9) | 8 (6.9)  | 0 (0.0) | 0 (0.0) | 0 (0.0) | 38 (32.8) |
| Alopecia                             | 27 (23.3) | 0 (0.0)  | 0 (0.0) | 0 (0.0) | 0 (0.0) | 27 (23.3) |
| Stomatitis                           | 26 (22.4) | 11 (9.5) | 1 (0.9) | 0 (0.0) | 0 (0.0) | 38 (32.8) |
| Hepatic function abnormal            | 20 (17.2) | 2 (1.7)  | 2 (1.7) | 0 (0.0) | 0 (0.0) | 24 (20.7) |
| Nausea                               | 16 (13.8) | 5 (4.3)  | 0 (0.0) | 0 (0.0) | 0 (0.0) | 21 (18.1) |
| Dyspnea                              | 12 (10.3) | 4 (3.4)  | 1 (0.9) | 0 (0.0) | 0 (0.0) | 17 (14.7) |
| Dysphagia                            | 10 (8.6)  | 2 (1.7)  | 0 (0.0) | 0 (0.0) | 0 (0.0) | 12 (10.3) |
| White blood cell count decreased     | 3 (2.6)   | 0 (0.0)  | 0 (0.0) | 0 (0.0) | 0 (0.0) | 3 (2.6)   |
| Neutrophil count decreased           | 2 (1.7)   | 1 (0.9)  | 0 (0.0) | 0 (0.0) | 0 (0.0) | 3 (2.6)   |
| Paronychia                           | 2 (1.7)   | 0 (0.0)  | 0 (0.0) | 0 (0.0) | 0 (0.0) | 2 (1.7)   |
| Anemia                               | 1 (0.9)   | 0 (0.0)  | 0 (0.0) | 0 (0.0) | 0 (0.0) | 1 (0.9)   |
| Bilirubin increased                  | 1 (0.9)   | 0 (0.0)  | 0 (0.0) | 0 (0.0) | 0 (0.0) | 1 (0.9)   |
| Blood alkaline phosphatase increased | 1 (0.9)   | 0 (0.0)  | 0 (0.0) | 0 (0.0) | 0 (0.0) | 1 (0.9)   |
| Blood urine present                  | 1 (0.9)   | 0 (0.0)  | 0 (0.0) | 0 (0.0) | 0 (0.0) | 1 (0.9)   |
| Gastrointestinal pain                | 1 (0.9)   | 0 (0.0)  | 0 (0.0) | 0 (0.0) | 0 (0.0) | 1 (0.9)   |
| Protein urine                        | 1 (0.9)   | 0 (0.0)  | 0 (0.0) | 0 (0.0) | 0 (0.0) | 1 (0.9)   |
| Chronic gastritis                    | 0 (0.0)   | 1 (0.9)  | 0 (0.0) | 0 (0.0) | 0 (0.0) | 1 (0.9)   |
| Creatinine increased                 | 0 (0.0)   | 1 (0.9)  | 0 (0.0) | 0 (0.0) | 0 (0.0) | 1 (0.9)   |
| Dyspepsia                            | 0 (0.0)   | 1 (0.9)  | 0 (0.0) | 0 (0.0) | 0 (0.0) | 1 (0.9)   |
| Headache                             | 0 (0.0)   | 0 (0.0)  | 0 (0.0) | 0 (0.0) | 1 (0.9) | 1 (0.9)   |

**Abbreviations:** TRAЕ, treatment-related adverse event; NA, not applicable.

**eTable 3.** The Clinical Outcomes of Patients With *EGFR* Variants Detected Using 3 Independent Platforms

| SuperARMS | ddPCR | NGS | N  | ORR<br>(95%CI)<br>(%) | DCR<br>(95%CI)<br>(%) | mPFS<br>(95%CI)<br>(months) | mOS<br>(95%CI)<br>(months) | mDOR<br>(95%CI)<br>(months) |
|-----------|-------|-----|----|-----------------------|-----------------------|-----------------------------|----------------------------|-----------------------------|
| +         |       |     | 84 | 60.7 (49.5,<br>71.2)  | 90.5 (82.1,<br>95.8)  | 10.4 (7.7,<br>12.4)         | 22.2<br>(17.5,<br>28.0)    | 8.2 (7.3,<br>11.7)          |
|           | +     |     | 86 | 61.6 (50.5,<br>71.9)  | 87.2 (78.3,<br>93.4)  | 8.8 (7.2,<br>12.0)          | 23.6<br>(17.7,<br>28.2)    | 8.2 (7.3,<br>11.7)          |
|           |       | +   | 95 | 56.8 (46.3,<br>67.0)  | 85.3 (76.5,<br>91.7)  | 9.7 (7.3,<br>11.9)          | 22.2<br>(17.3,<br>28.0)    | 8.6 (6.2,<br>11.7)          |
| +         | +     |     | 73 | 65.8 (53.7,<br>76.5)  | 90.4 (81.2,<br>96.1)  | 8.6 (7.1,<br>12.0)          | 22.2<br>(17.5,<br>28.0)    | 8.2(6.2,<br>11.7)           |
| +         |       | +   | 71 | 64.8 (52.5,<br>75.8)  | 91.5 (82.5,<br>96.8)  | 10.3 (7.3,<br>12.0)         | 21.4<br>(17.3,<br>28.0)    | 8.2 (6.2,<br>11.3)          |
|           | +     | +   | 70 | 67.1 (54.9,<br>77.9)  | 88.6 (78.7,<br>94.9)  | 8.5 (7.1,<br>11.9)          | 21.8<br>(17.3,<br>28.0)    | 8.2 (6.2,<br>11.7)          |
| +         | +     | +   | 65 | 67.7 (54.9,<br>78.8)  | 90.8 (81.0,<br>96.5)  | 8.6 (7.2,<br>12.0)          | 21.4<br>(17.3,<br>28.0)    | 8.0 (6.2,<br>11.3)          |

**Abbreviations:** EGFR, epidermal growth factor receptor; SuperARMS, Super-Amplification Refractory Mutation System; ddPCR, digital Polymerase Chain Reaction; NGS, next-generation sequencing; ORR, overall response rate; CI, confidence interval; DCR, disease control rate; mPFS, median progression-free survival; mOS, median overall survival; mDOR, median duration of response.

**eFigure.** Venn Diagram Exhibiting the Distribution and Clinical Outcomes of Patients With *EGFR* Variants Detected Using 3 Independent Platforms

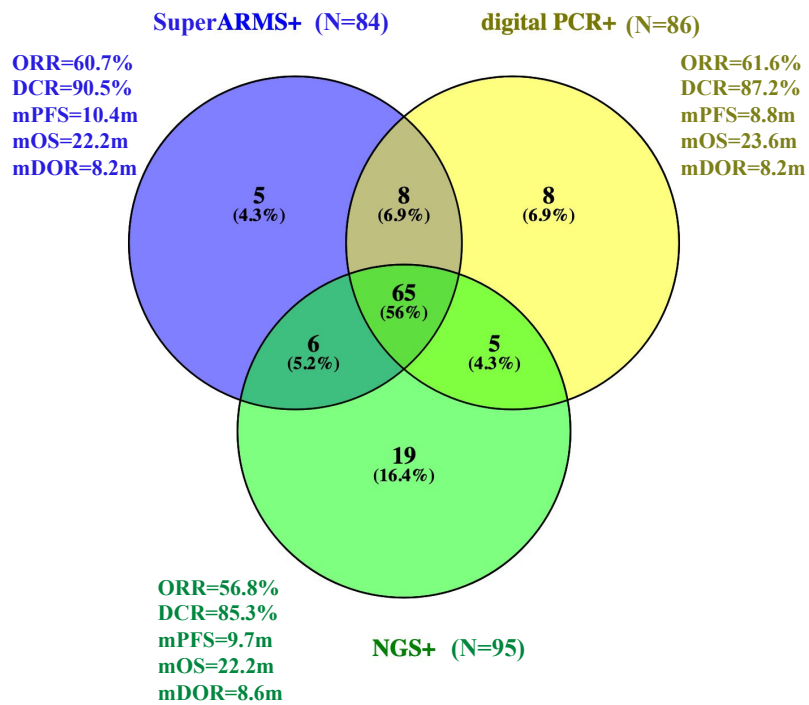

**Abbreviations:** EGFR, epidermal growth factor receptor; SuperARMS, Super-Amplification Refractory Mutation System; ddPCR, digital Polymerase Chain Reaction; NGS, next-generation sequencing; ORR, overall response rate; DCR, disease control rate; mPFS, median progression-free survival; mOS, median overall survival; mDOR, median duration of response.

## **eReferences.**

1. Li Y, Xu H, Su S, et al. Clinical validation of a highly sensitive assay to detect EGFR mutations in plasma cell-free DNA from patients with advanced lung adenocarcinoma. *PLoS ONE*. 2017; 12(8): e0183331.
2. Zhu G, Ye X, Dong Z, et al. Highly Sensitive Droplet Digital PCR Method for Detection of EGFR-Activating Mutations in Plasma Cell-Free DNA from Patients with Advanced Non-Small Cell Lung Cancer. *J Mol Diagn*. 2015; 17(3): 265-72.
3. Yang Y, Huang J, Wang T, et al. Decoding the Evolutionary Response to Ensartinib in Patients With ALK-Positive NSCLC by Dynamic Circulating Tumor DNA Sequencing. 2021; 16 (5): 827-839.
